# Supplementary material for: Aberrant subchondral osteoblastic metabolism modifies NaV1.8 for osteoarthritis
Source: PubMed Central journal article supplement (PMC7308086; doi:10.7554/elife.57656), 2020-05-22

Full scan of western blots in Figure 2 figure Supplement 1i

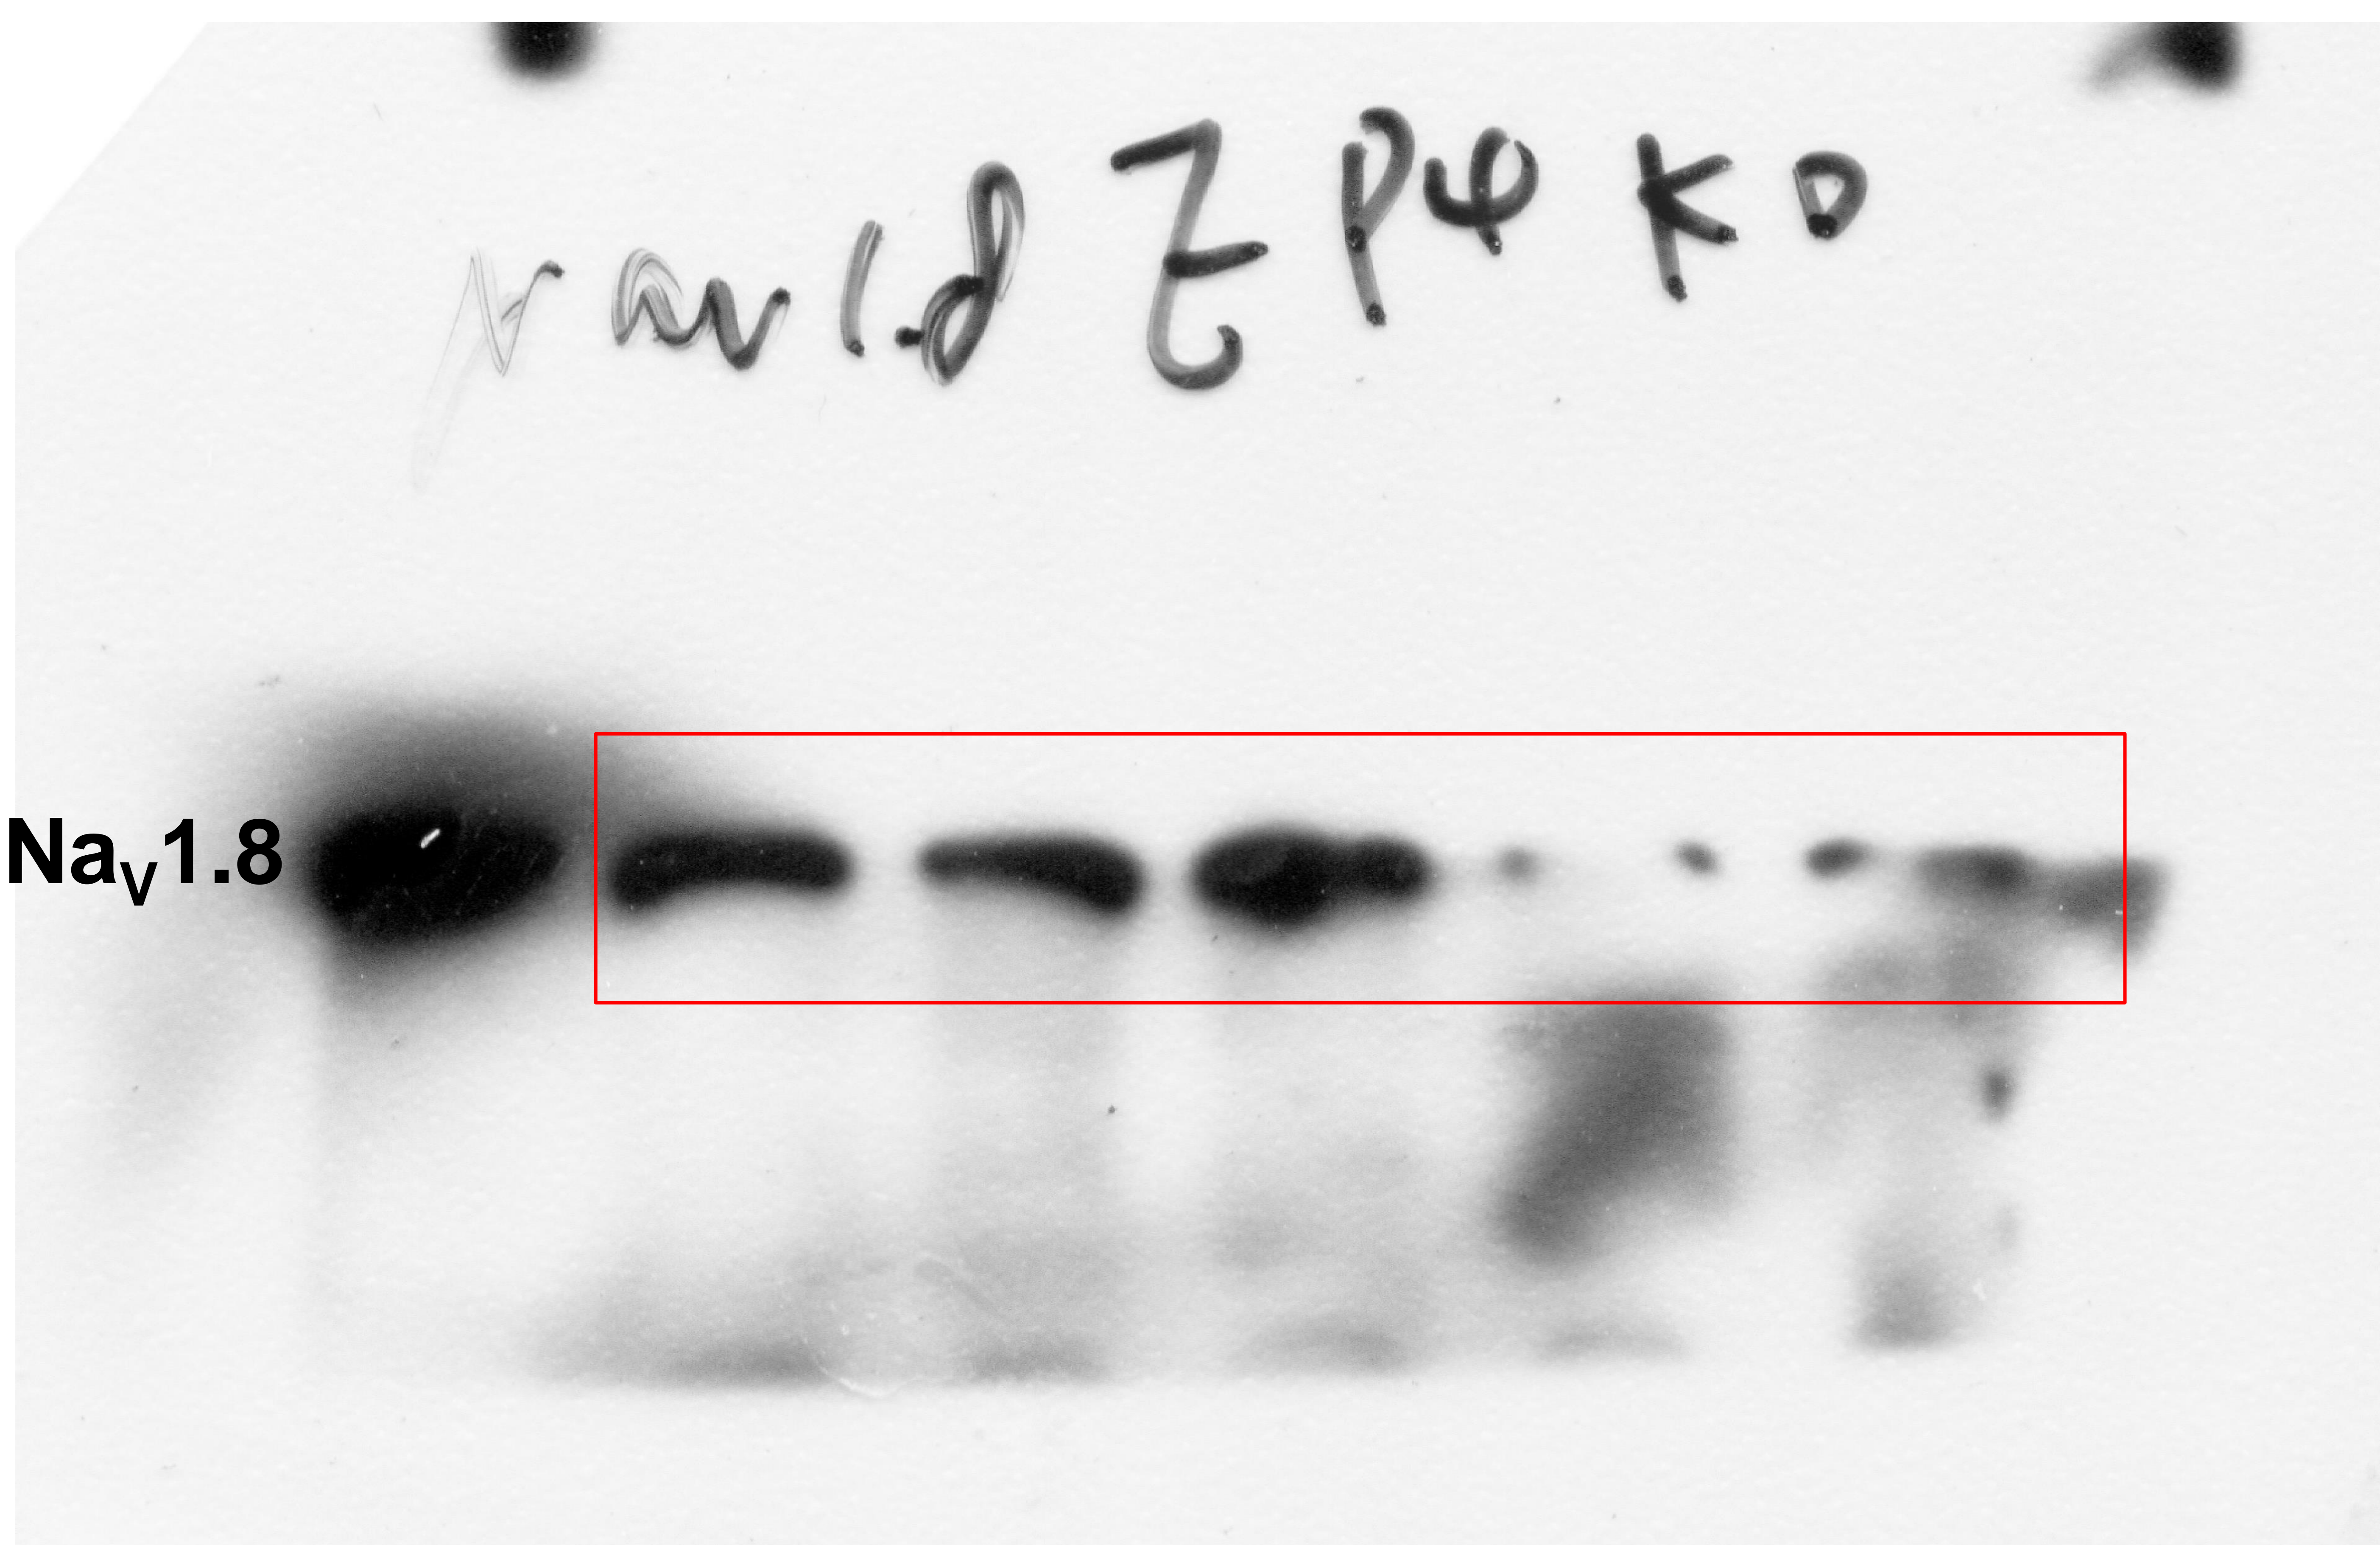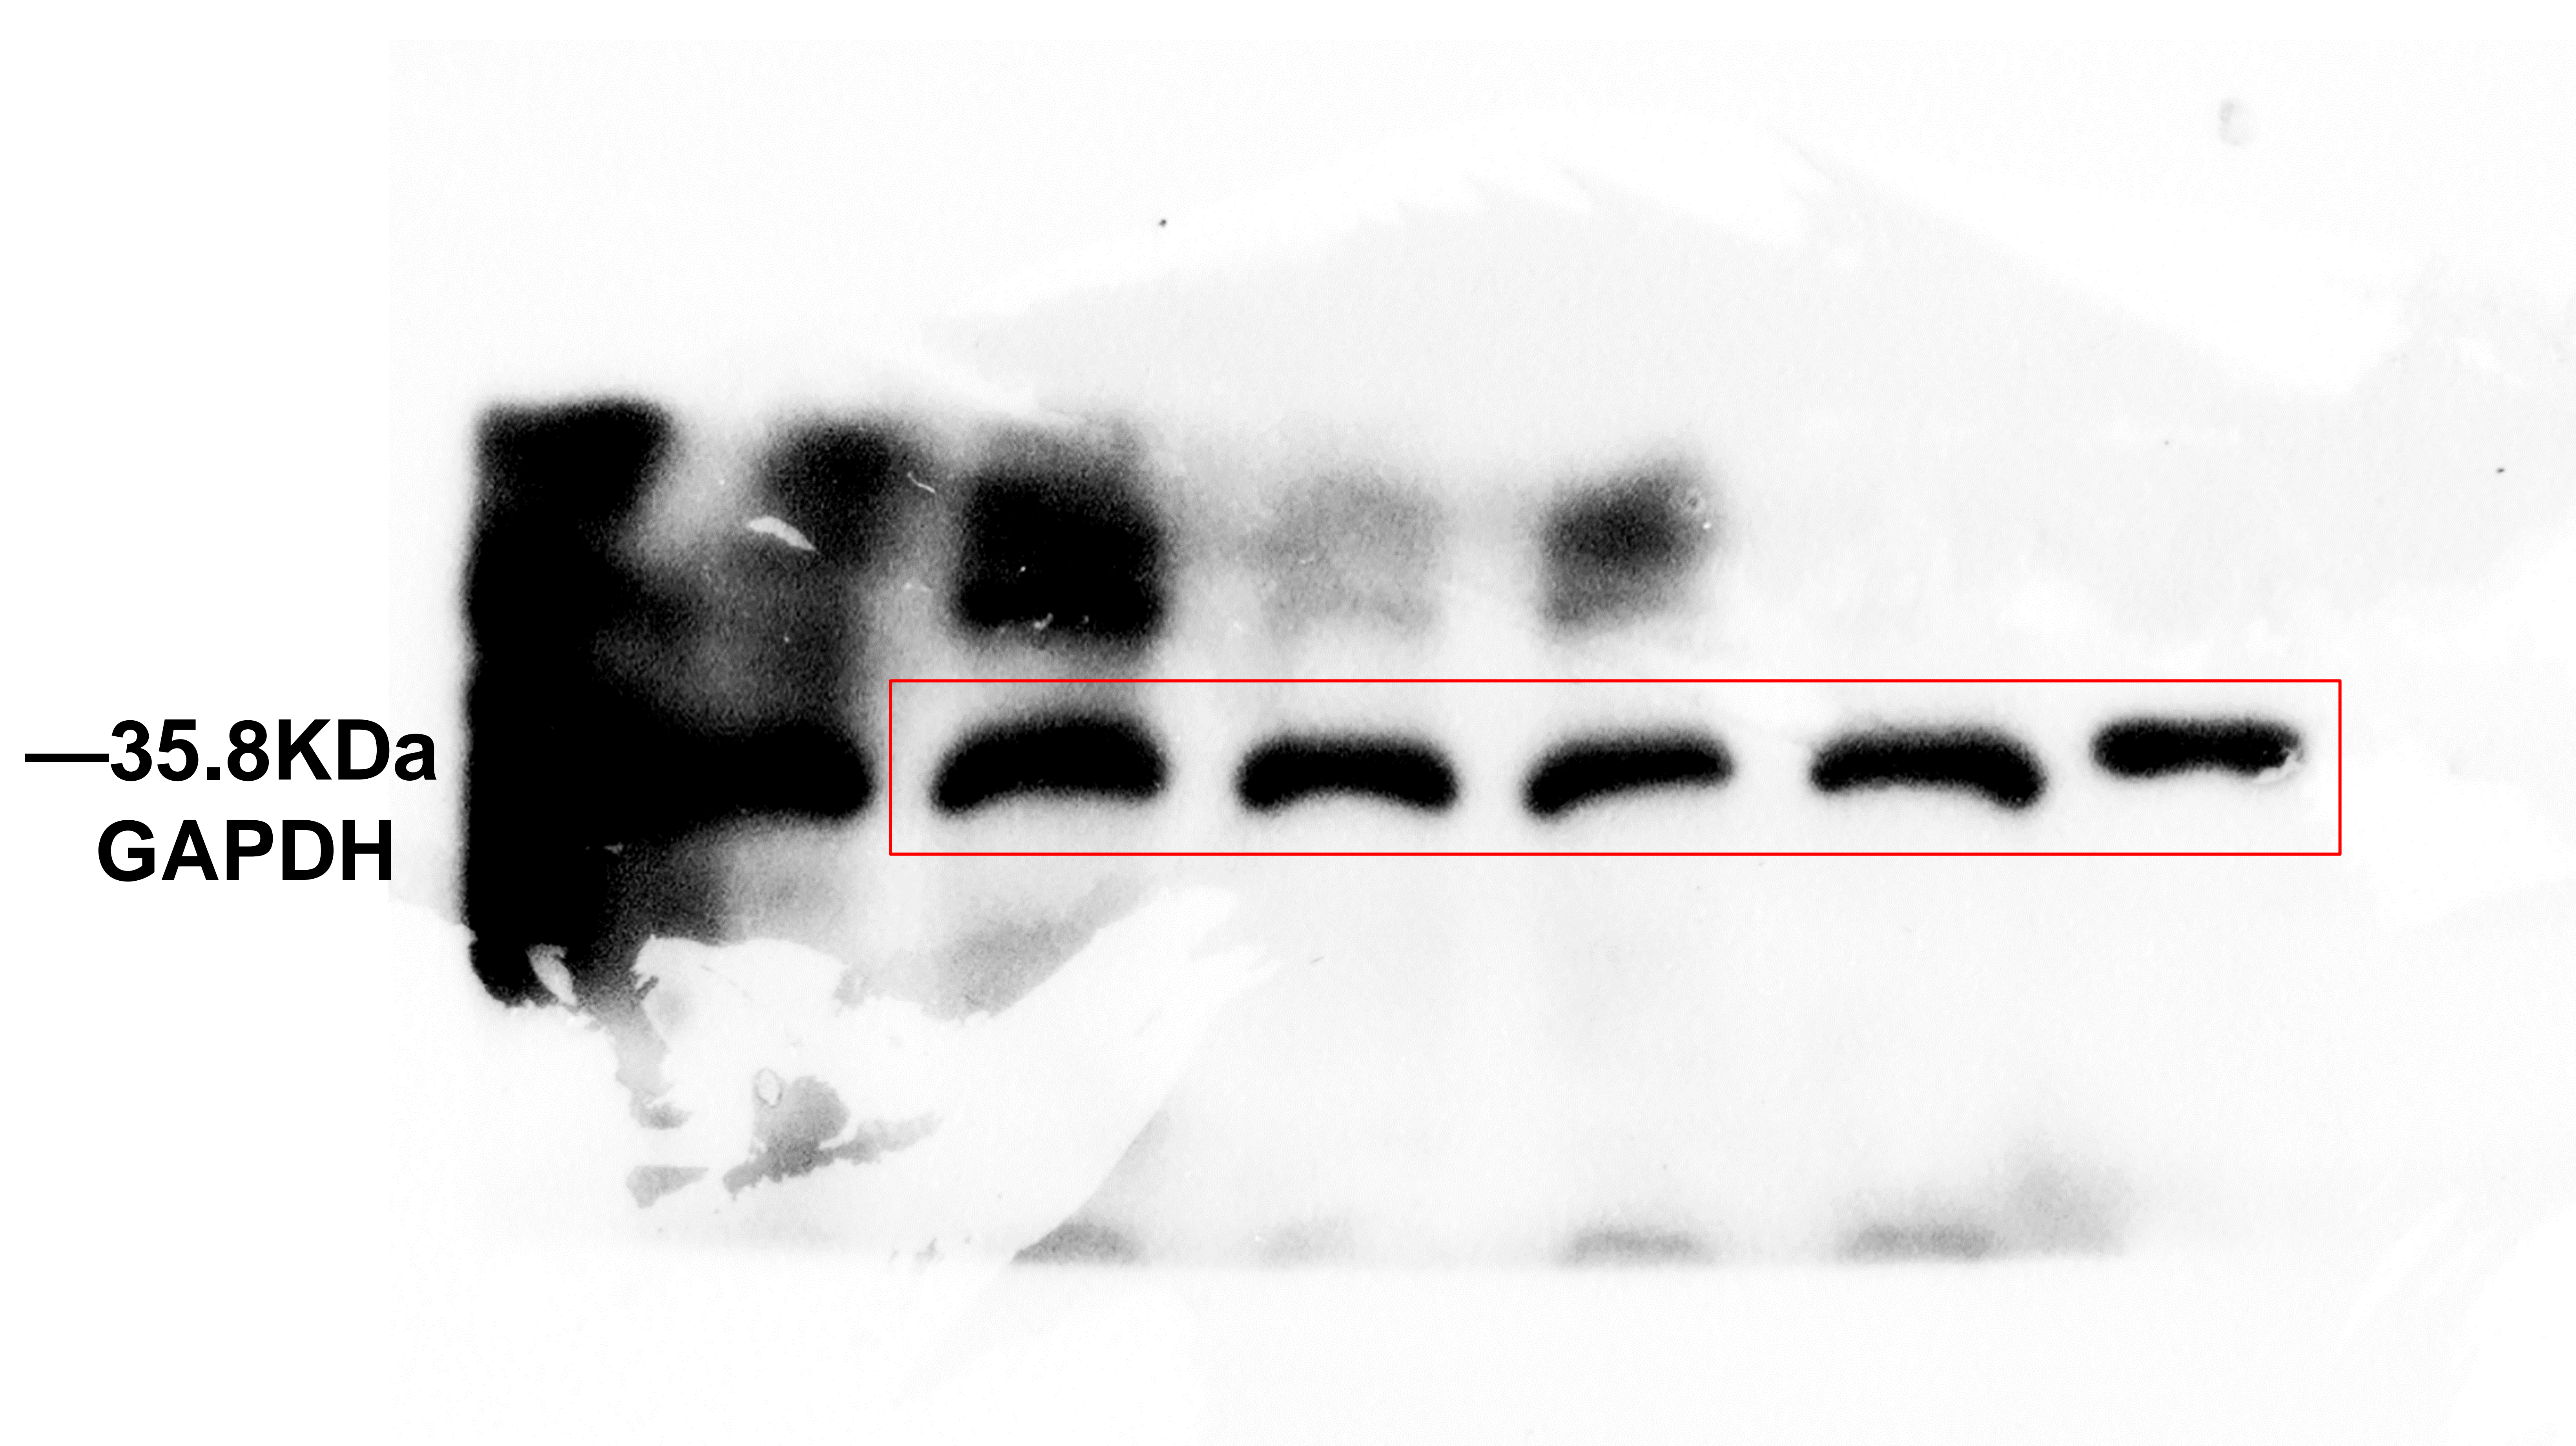

Supplement: elife-57656-fig2-figsupp1-data1.pdf [file elife-57656-fig2-figsupp1-data1.pdf]
