# Supplementary material for: Aberrant subchondral osteoblastic metabolism modifies NaV1.8 for osteoarthritis
Source: PubMed Central journal article supplement (PMC7308086; doi:10.7554/elife.57656), 2020-05-22

Full scan of DNA gel in Figure 4k

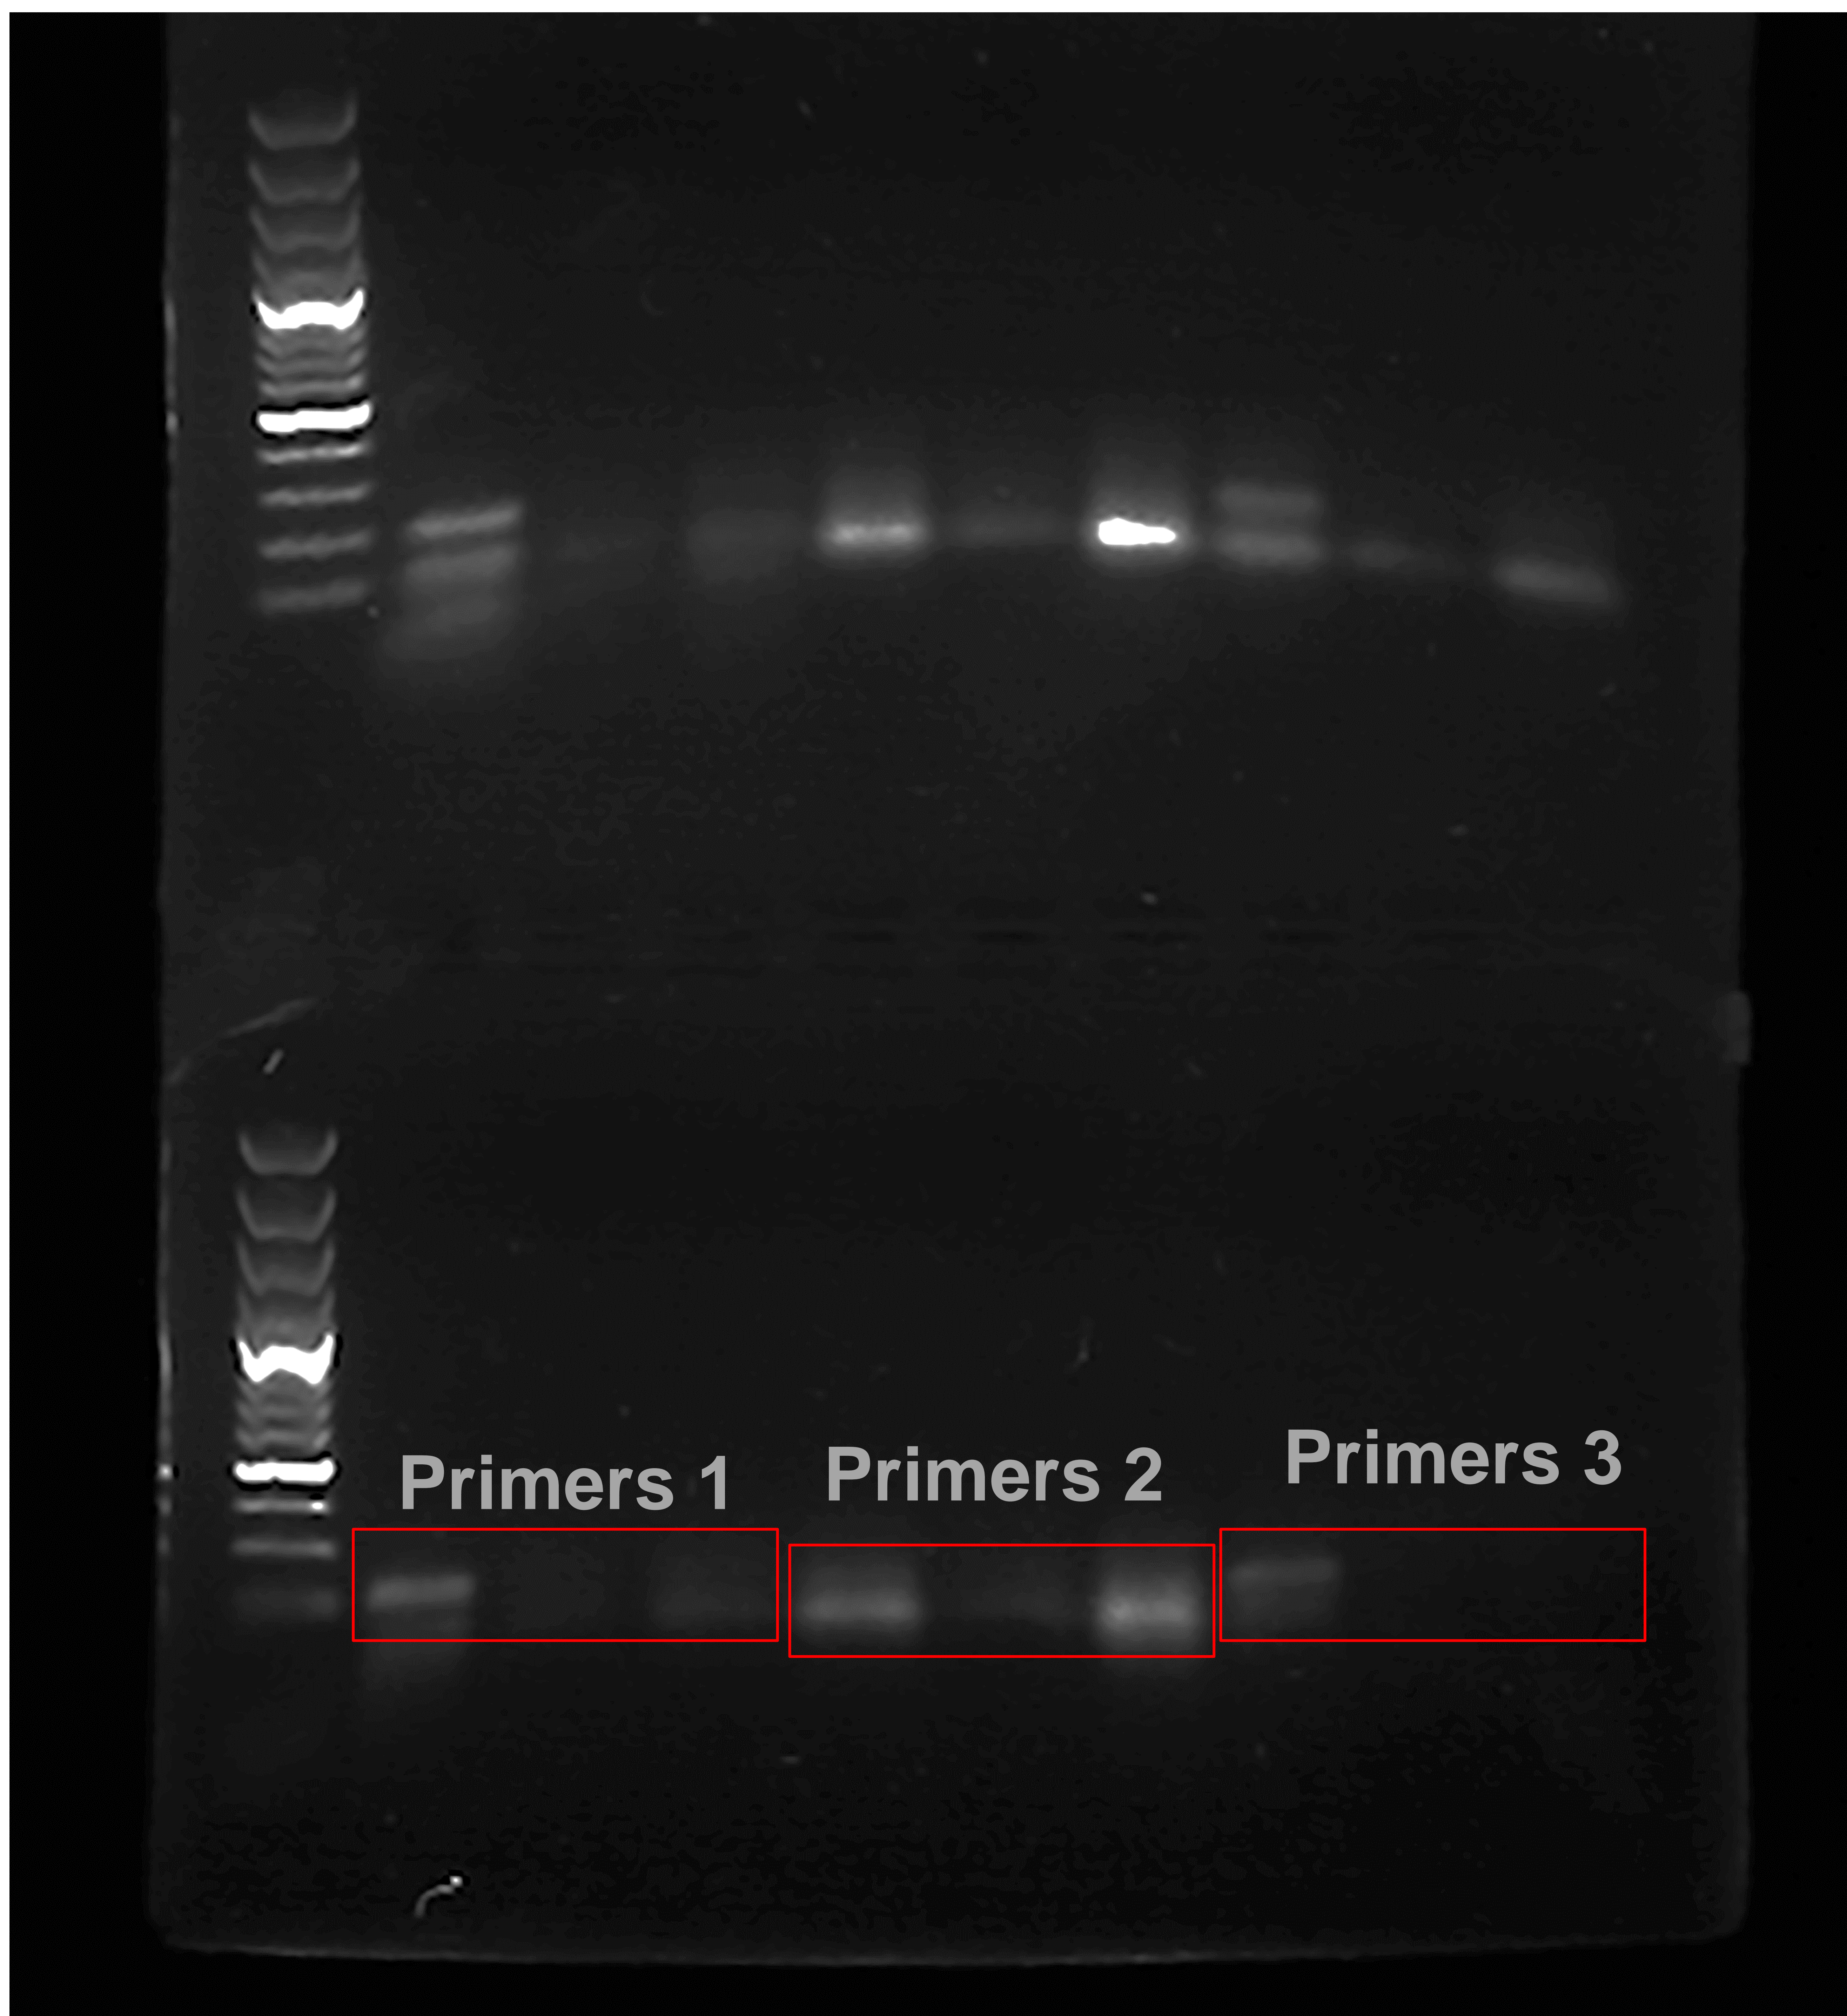

Supplement: elife-57656-fig4-data4.pdf [file elife-57656-fig4-data4.pdf]
