# Supplementary material for: Aberrant subchondral osteoblastic metabolism modifies NaV1.8 for osteoarthritis
Source: eLife journal article supplement (doi:10.7554/elife.57656), 2020-05-22

Full scan of western blots in Figure 4b

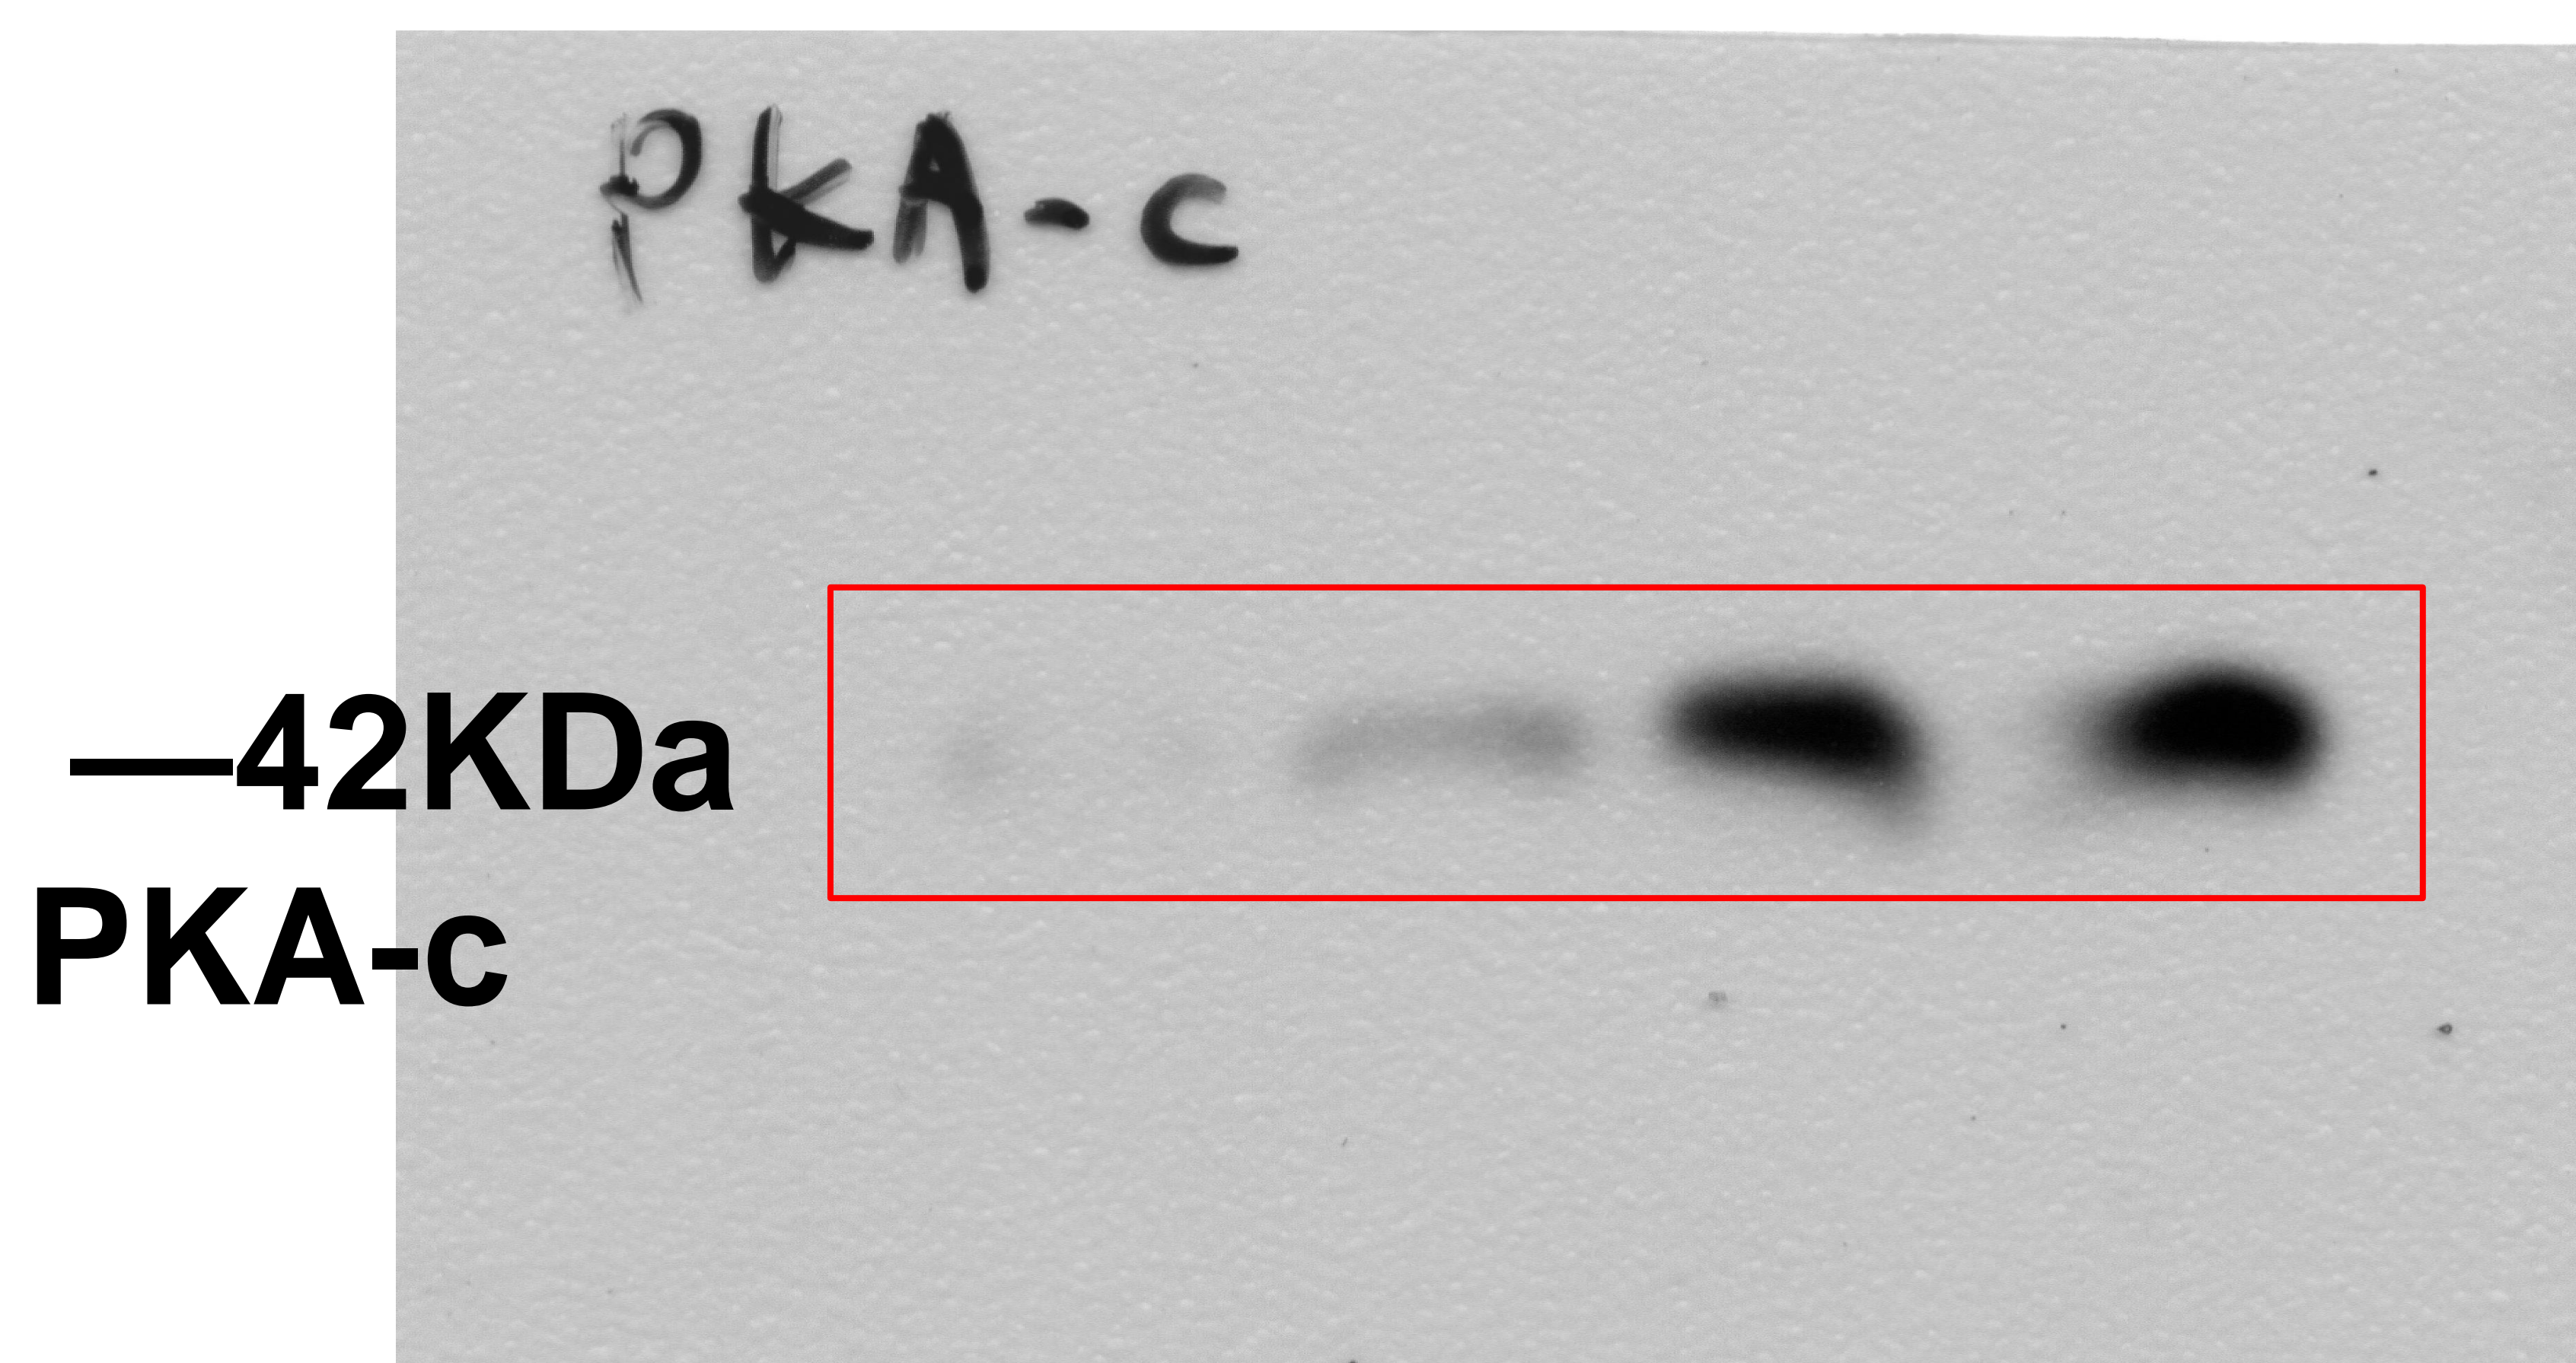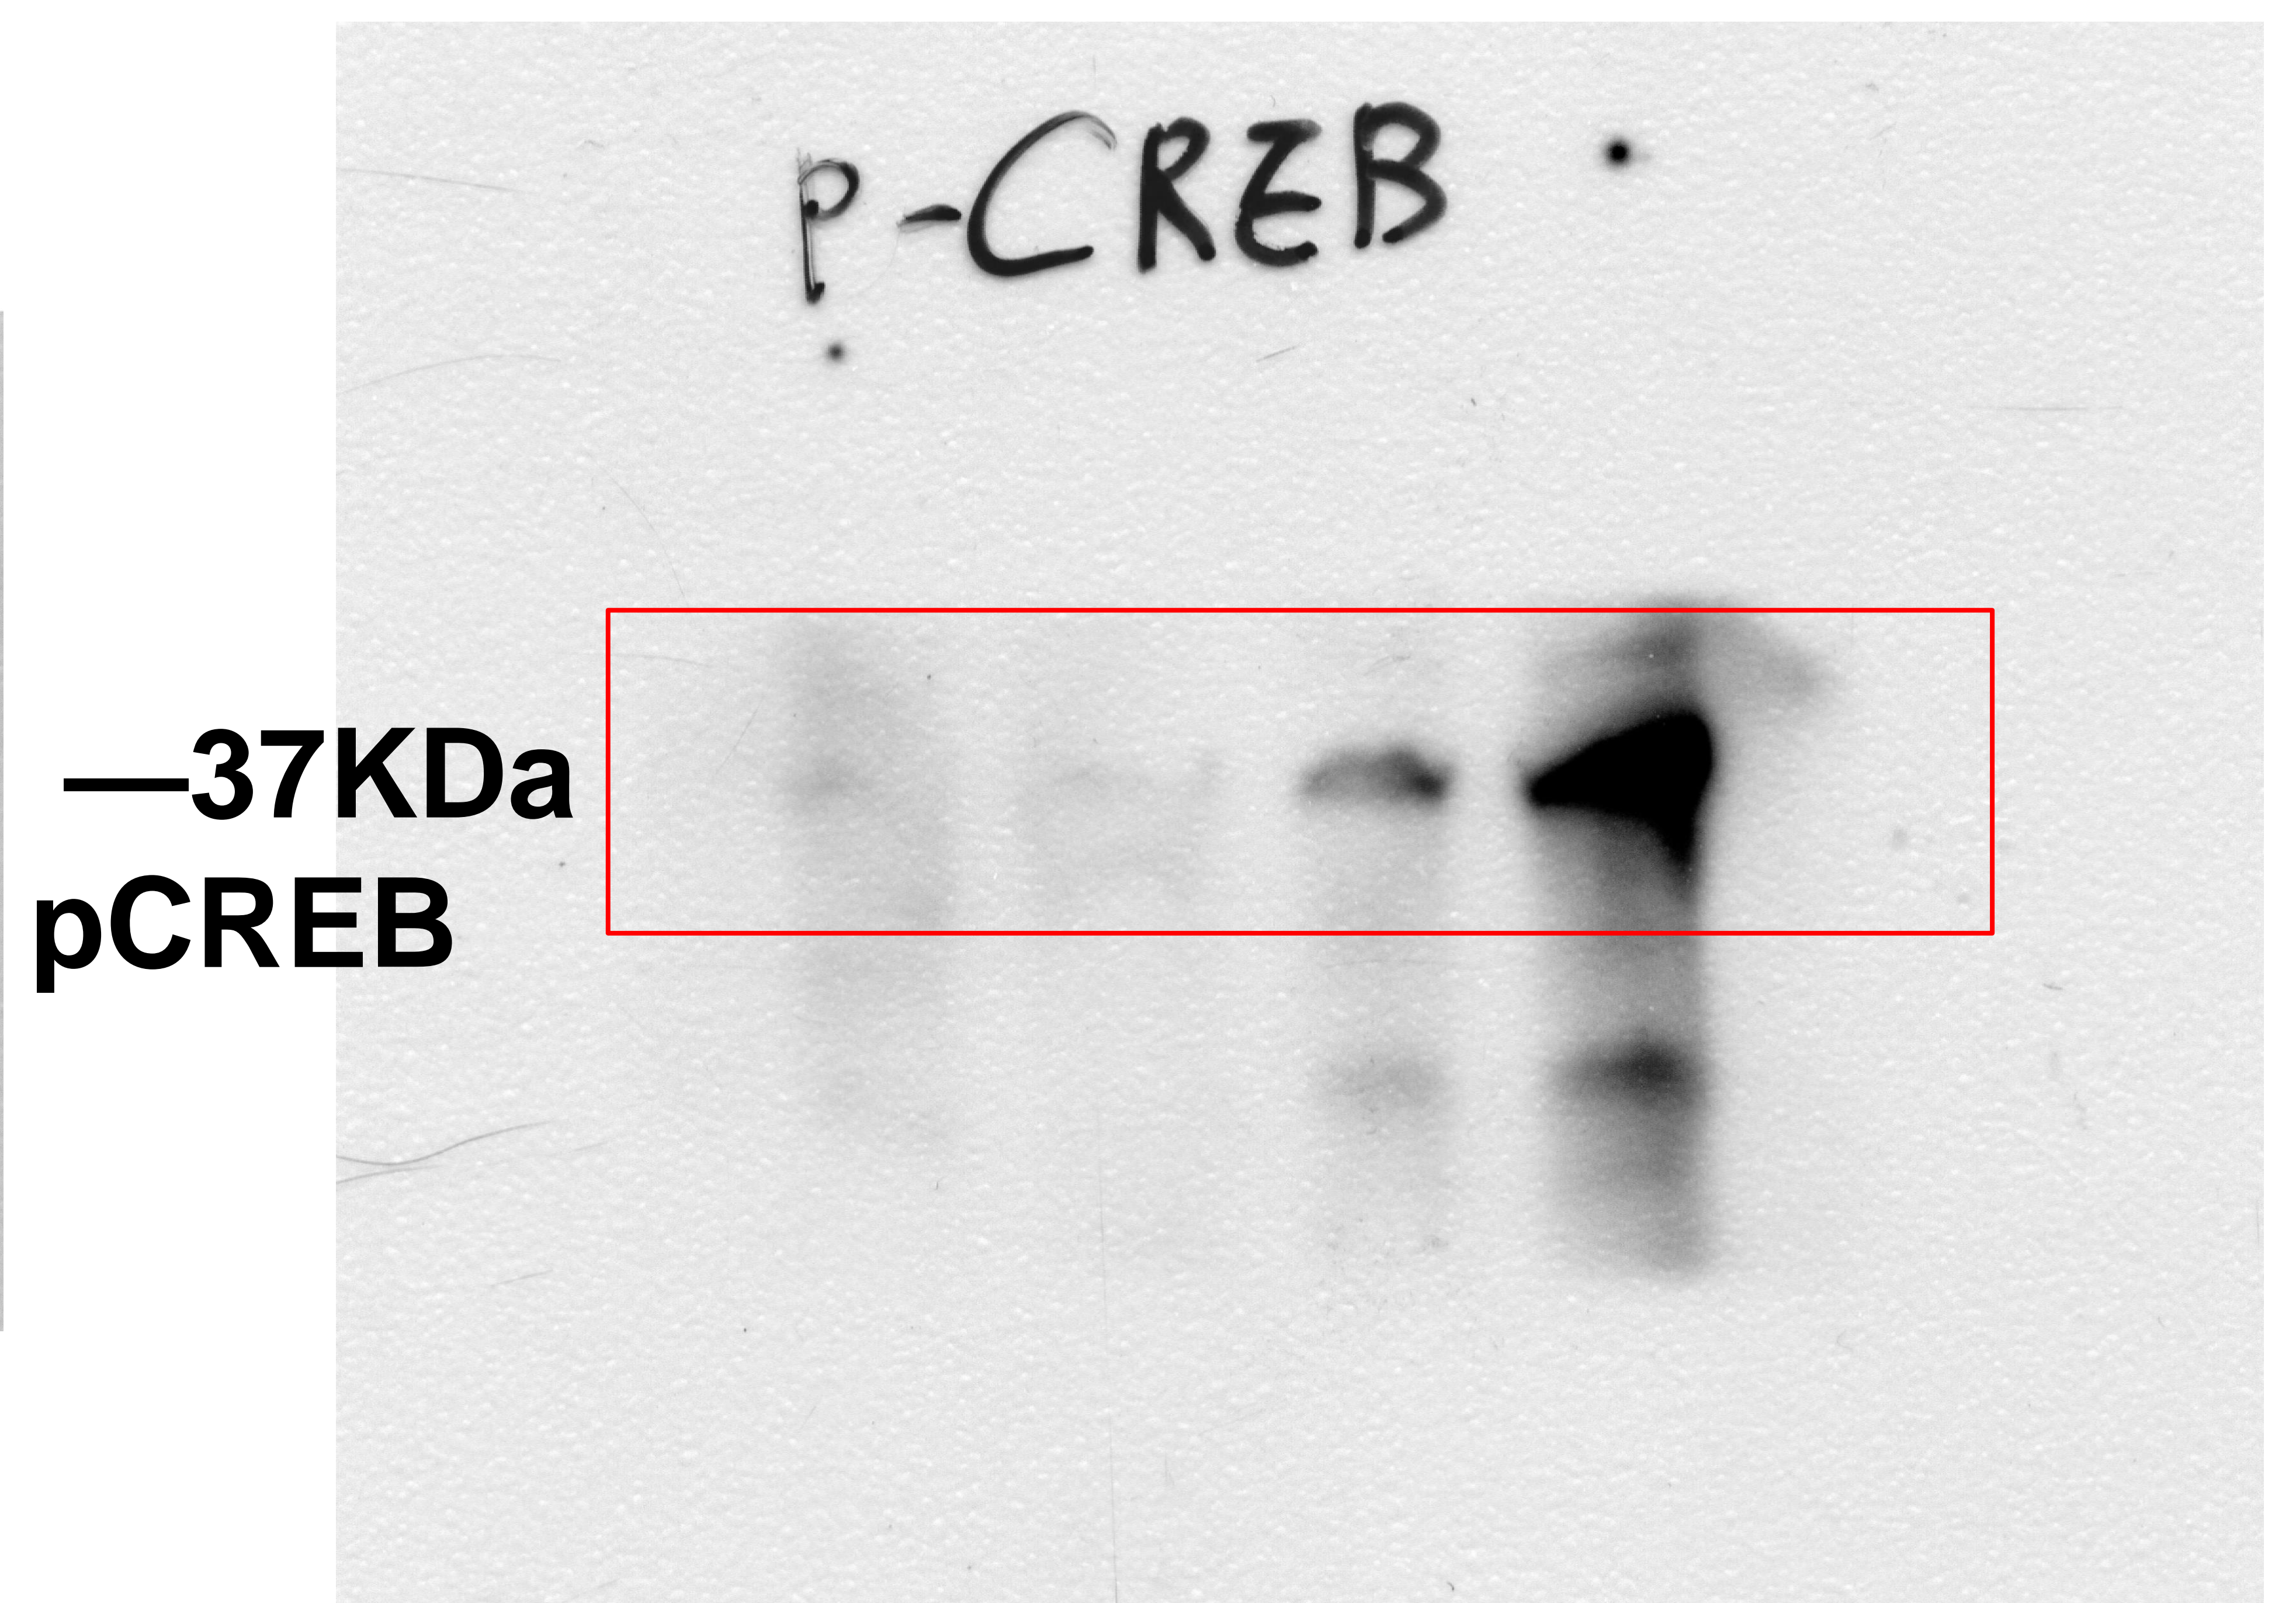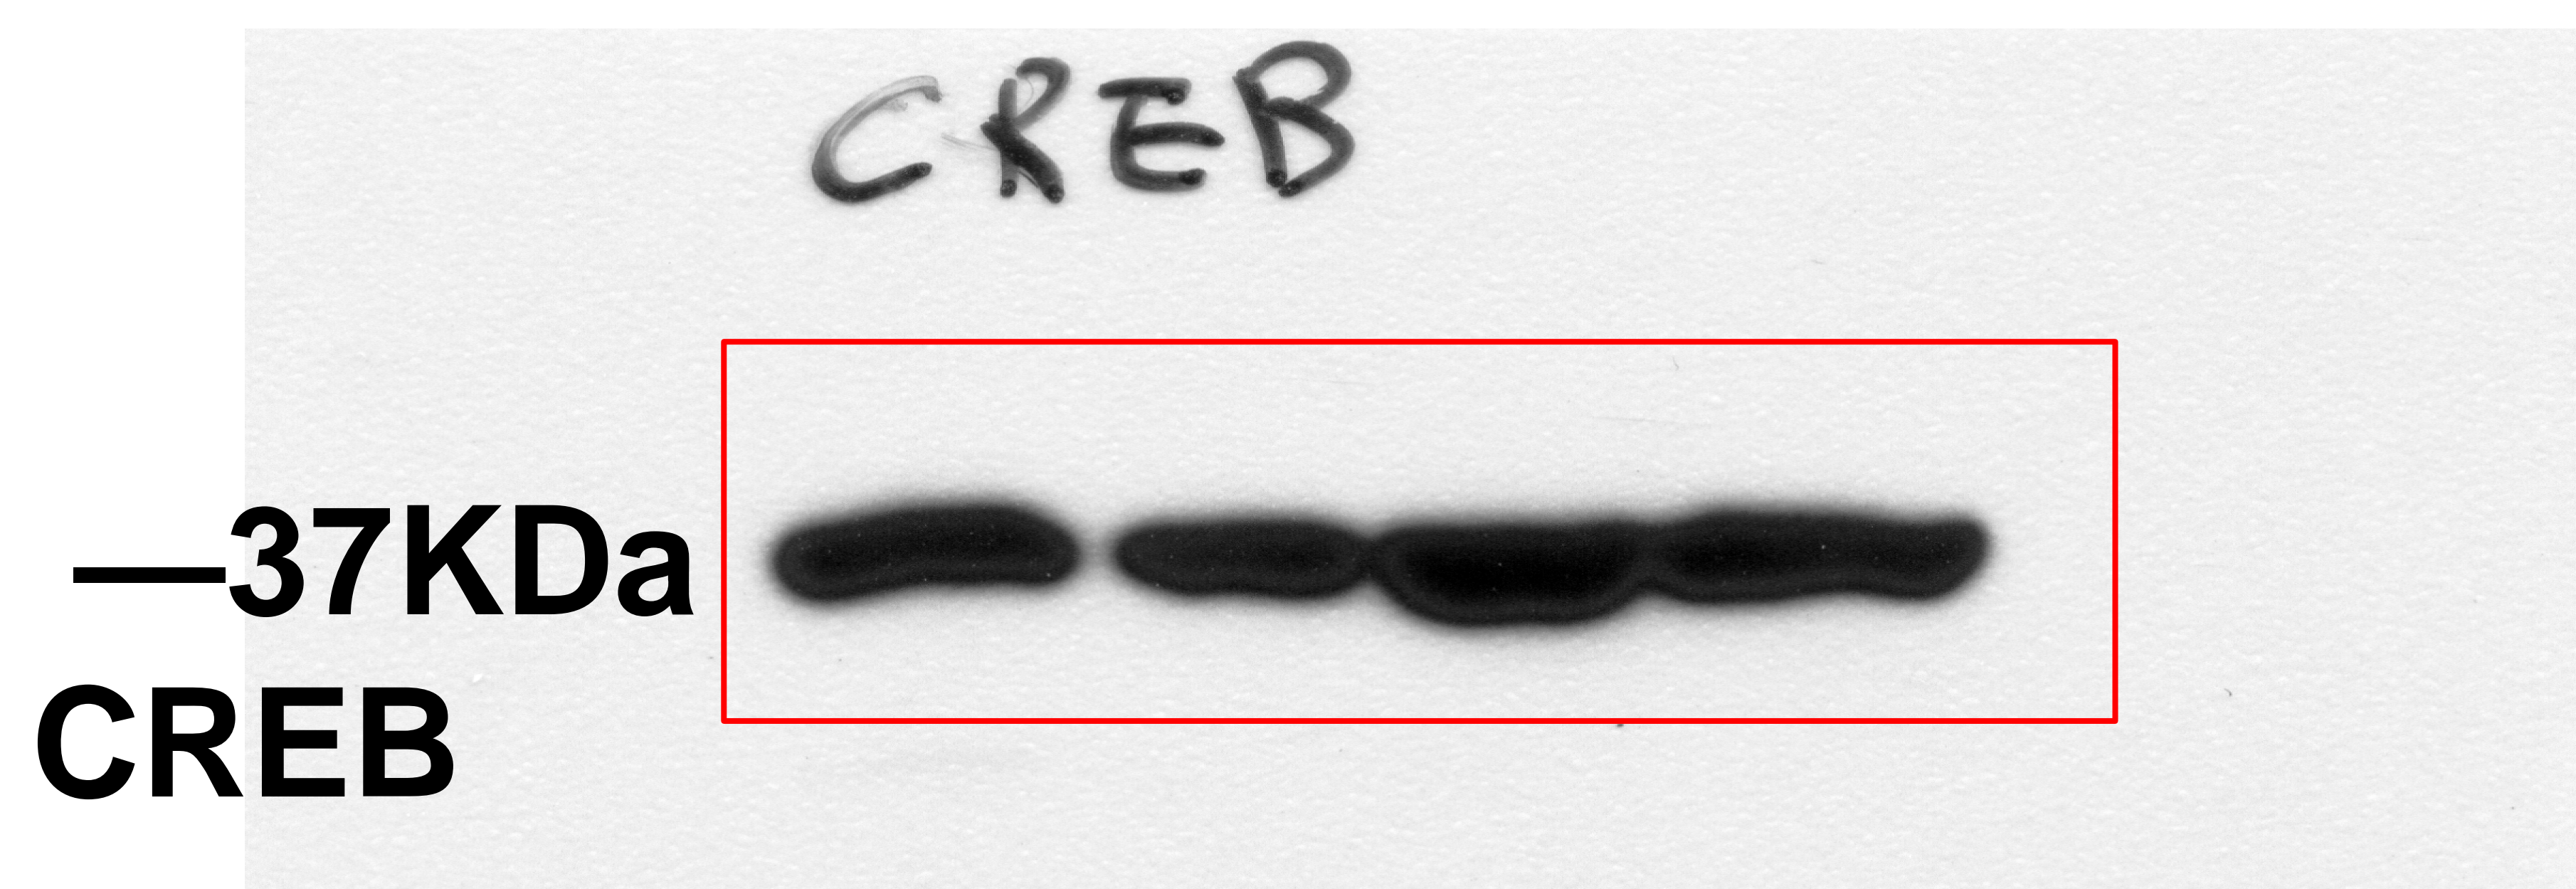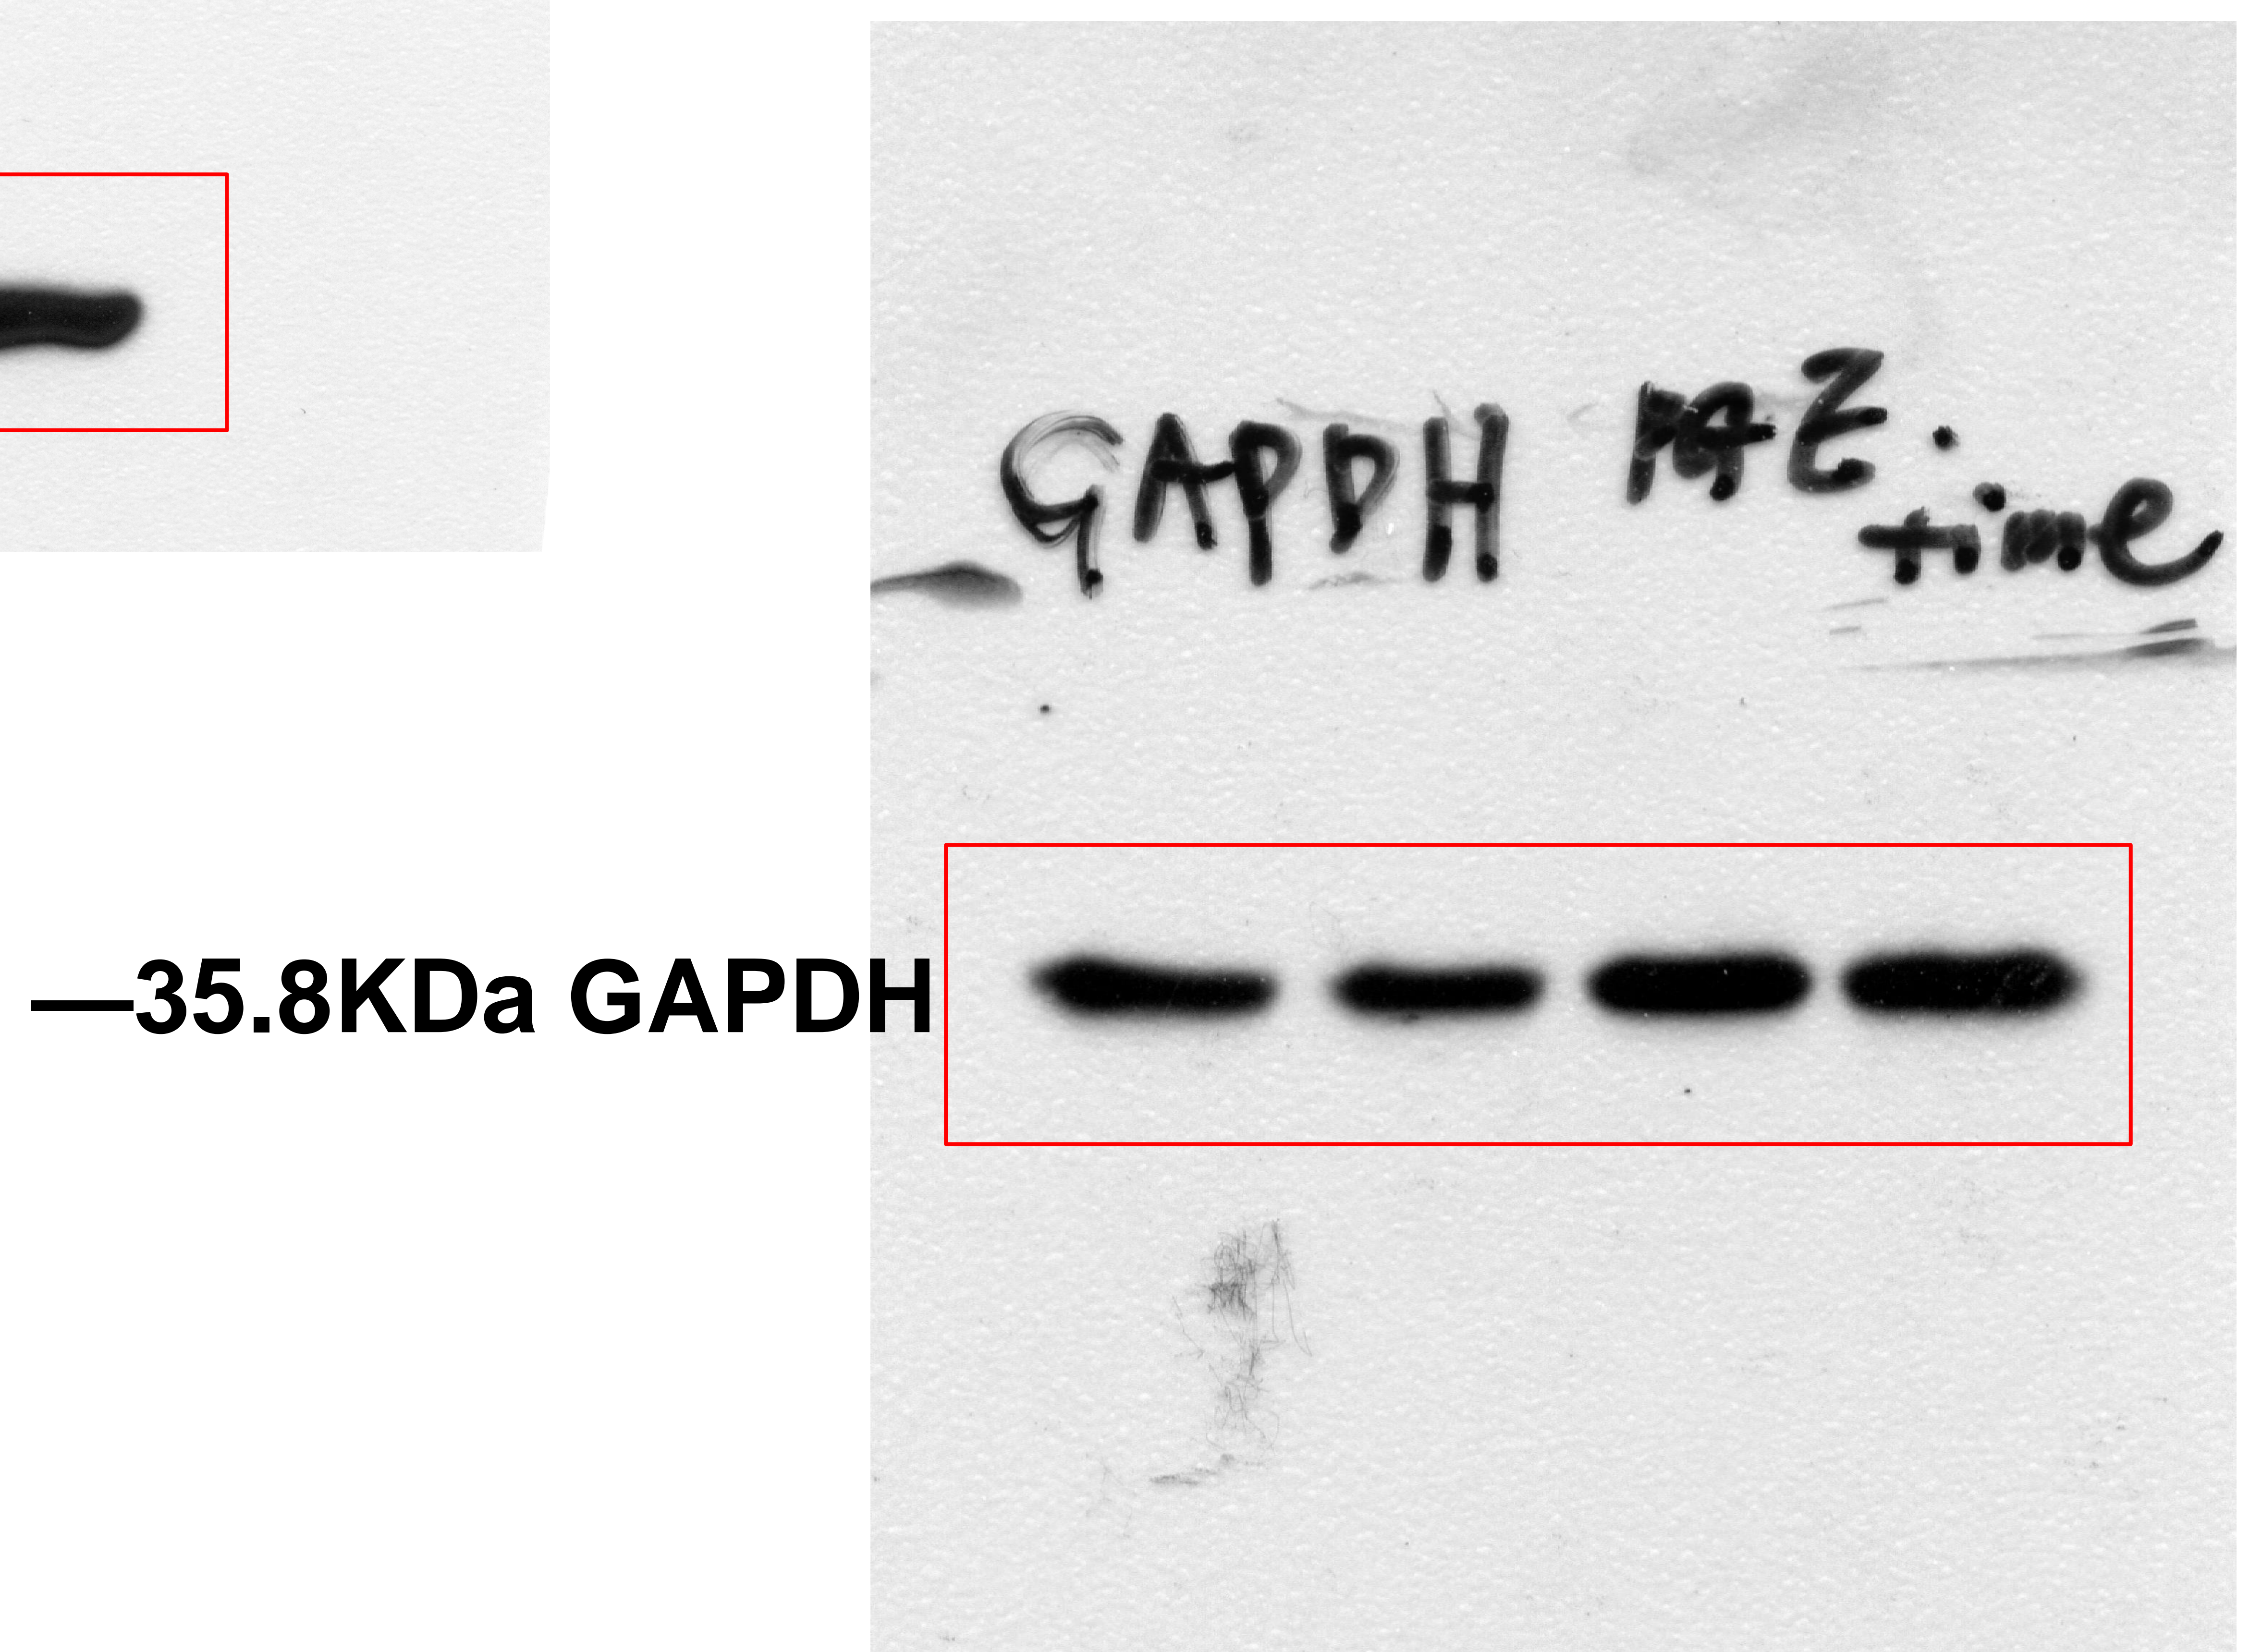

Supplement: fig4-data2 [file elife-57656-fig4-data2-v2.pdf]
