# Supplementary material for: Aberrant subchondral osteoblastic metabolism modifies NaV1.8 for osteoarthritis
Source: eLife. 2020 May 22;9:e57656. doi: 10.7554/eLife.57656 (PMC7308086; doi:10.7554/eLife.57656)
Supplement: Figure 1—source data 1. [file elife-57656-fig1-data1.xlsx]

## Sheet: Sheet1
Pirt- GcAMP3 imaging				Retrograde tracing	Retrograde tracing		Von Frey tests
sham	ACLT			sham	ACLT			sham			ACLT
12	51			10.1	35.2			mean	sd	n	mean	sd	n
7	42			8.8	24.7		0 d	2.5	0.4	8	2.3	0.5	8
15	39			12.5	29.1		7 d	2.1	0.4	8	0.8	0.3	8
				18.6	28.1		14 d	2.7	0.4	8	1.1	0.3	8
Table Analyzed	DRG GcAMP3			11.7	17.2		21 d	2.8	0.4	8	0.9	0.3	8
				17.3	15.9		28 d	3.1	0.5	8	1.2	0.4	8
Column B	ACLT						42 d	3	0.4	8	1.1	0.3	8
vs.	vs.			Table Analyzed	Retrograde tracing		56 d	3.2	0.5	8	1.4	0.4	8
Column A	sham
				Column B	Data Set-B		Table Analyzed	Von Frey
Unpaired t test				vs.	vs.
P value	0.0016			Column A	Data Set-A		Two-way ANOVA	Ordinary
P value summary	**						Alpha	0.05
Significantly different (P < 0.05)?	Yes			Unpaired t test
One- or two-tailed P value?	Two-tailed			P value	0.0061		Source of Variation	% of total variation	P value	P value summary	Significant?
t, df	t=7.606, df=4			P value summary	**		Interaction	9.348	<0.0001	****	Yes
				Significantly different (P < 0.05)?	Yes		Row Factor	9.857	<0.0001	****	Yes
How big is the difference?				One- or two-tailed P value?	Two-tailed		Column Factor	64.99	<0.0001	****	Yes
Mean of column A	11.33			t, df	t=3.465, df=10
Mean of column B	44						ANOVA table	SS	DF	MS	F (DFn, DFd)	P value
Difference between means (B - A) ± SEM	32.67 ± 4.295			How big is the difference?			Interaction	9.234	6	1.539	F (6, 98) = 9.662	P<0.0001
95% confidence interval	20.74 to 44.59			Mean of column A	13.17		Row Factor	9.737	6	1.623	F (6, 98) = 10.19	P<0.0001
R squared (eta squared)	0.9353			Mean of column B	25.03		Column Factor	64.21	1	64.21	F (1, 98) = 403.1	P<0.0001
				Difference between means (B - A) ± SEM	11.87 ± 3.425		Residual	15.61	98	0.1593
F test to compare variances				95% confidence interval	4.236 to 19.50
F, DFn, Dfd	2.388, 2, 2			R squared (eta squared)	0.5456		Difference between column means
P value	0.5904						Mean of sham	2.771
P value summary	ns			F test to compare variances			Mean of ACLT	1.257
Significantly different (P < 0.05)?	No			F, DFn, Dfd	3.530, 5, 5		Difference between means	1.514
				P value	0.1925		SE of difference	0.07542
Data analyzed				P value summary	ns		95% CI of difference	1.365 to 1.664
Sample size, column A	3			Significantly different (P < 0.05)?	No
Sample size, column B	3
				Data analyzed
				Sample size, column A	6
				Sample size, column B	6
subchondral nav1.8 nerve fiber density
sham						ACLT
1	1.1	1.2	1	0.9	1.1	2.5	2.6	2.8	3.1	2	1.9
1.2	1.2	1	0.8	0.7	1.1	2.7	3.6	3.9	1.8	2.9	2.4
	Compare each cell mean with the other cell mean in that row
	Number of families	1
	Number of comparisons per family	2
	Alpha	0.05
	Sidak's multiple comparisons test	Mean Diff.	95.00% CI of diff.	Significant?	Summary	Adjusted P Value
	sham - ACLT
	1 m	-1.433	-2.083 to -0.7839	Yes	****	<0.0001
	2 m	-1.883	-2.533 to -1.234	Yes	****	<0.0001
	Test details	Mean 1	Mean 2	Mean Diff.	SE of diff.	N1	N2	t	DF
	sham - ACLT
	1 m	1.05	2.483	-1.433	0.2687	6	6	5.335	20
	2 m	1	2.883	-1.883	0.2687	6	6	7.009	20
AP traces
	PBS				A-803467
sham	2	4	3	5	2	1	3	3
ACLT	12	14	18	15	11	7	5	8
Compare cell means regardless of rows and columns
Number of families	1
Number of comparisons per family	6
Alpha	0.05
Sidak's multiple comparisons test	Mean Diff.	95.00% CI of diff.	Significant?	Summary	Adjusted P Value
sham:PBS vs. sham:A-803467	1.25	-3.063 to 5.563	No	ns	0.9435
sham:PBS vs. ACLT:PBS	-11.25	-15.56 to -6.937	Yes	****	<0.0001
sham:PBS vs. ACLT:A-803467	-4.25	-8.563 to 0.06324	No	ns	0.0544
sham:A-803467 vs. ACLT:PBS	-12.5	-16.81 to -8.187	Yes	****	<0.0001
sham:A-803467 vs. ACLT:A-803467	-5.5	-9.813 to -1.187	Yes	*	0.0104
ACLT:PBS vs. ACLT:A-803467	7	2.687 to 11.31	Yes	**	0.0016
Test details	Mean 1	Mean 2	Mean Diff.	SE of diff.	N1	N2	t	DF
sham:PBS vs. sham:A-803467	3.5	2.25	1.25	1.373	4	4	0.9103	12
sham:PBS vs. ACLT:PBS	3.5	14.75	-11.25	1.373	4	4	8.193	12
sham:PBS vs. ACLT:A-803467	3.5	7.75	-4.25	1.373	4	4	3.095	12
sham:A-803467 vs. ACLT:PBS	2.25	14.75	-12.5	1.373	4	4	9.103	12
sham:A-803467 vs. ACLT:A-803467	2.25	7.75	-5.5	1.373	4	4	4.006	12
ACLT:PBS vs. ACLT:A-803467	14.75	7.75	7	1.373	4	4	5.098	12
current density
	PBS				A-803467
sham	77.3	67.1	56.7	49.3	17.8	31.5	23.4	26.3
ACLT	114.2	100.2	141.2	89.2	52.1	34.1	38.6	22.9
Compare cell means regardless of rows and columns
Number of families	1
Number of comparisons per family	6
Alpha	0.05
Sidak's multiple comparisons test	Mean Diff.	95.00% CI of diff.	Significant?	Summary	Adjusted P Value
sham:PBS vs. sham:A-803467	37.85	5.803 to 69.90	Yes	*	0.0177
sham:PBS vs. ACLT:PBS	-48.6	-80.65 to -16.55	Yes	**	0.0028
sham:PBS vs. ACLT:A-803467	25.68	-6.372 to 57.72	No	ns	0.1518
sham:A-803467 vs. ACLT:PBS	-86.45	-118.5 to -54.40	Yes	****	<0.0001
sham:A-803467 vs. ACLT:A-803467	-12.18	-44.22 to 19.87	No	ns	0.8301
ACLT:PBS vs. ACLT:A-803467	74.28	42.23 to 106.3	Yes	****	<0.0001
Test details	Mean 1	Mean 2	Mean Diff.	SE of diff.	N1	N2	t	DF
sham:PBS vs. sham:A-803467	62.6	24.75	37.85	10.2	4	4	3.71	12
sham:PBS vs. ACLT:PBS	62.6	111.2	-48.6	10.2	4	4	4.764	12
sham:PBS vs. ACLT:A-803467	62.6	36.93	25.68	10.2	4	4	2.517	12
sham:A-803467 vs. ACLT:PBS	24.75	111.2	-86.45	10.2	4	4	8.474	12
sham:A-803467 vs. ACLT:A-803467	24.75	36.93	-12.18	10.2	4	4	1.193	12
ACLT:PBS vs. ACLT:A-803467	111.2	36.93	74.28	10.2	4	4	7.28	12
Navs expression rates in DRG after ACLT
	sham			ACLT
1.1	1	0	3	1.422	0.112	3
1.2	1	0	3	1.134	0.221	3
1.3	1	0	3	0.953	0.251	3
1.6	1	0	3	1.722	0.224	3
1.7	1	0	3	1.934	0.312	3
1.8	1	0	3	2.651	0.456	3
1.9	1	0	3	2.343	0.164	3
Table Analyzed	Data 1
Two-way ANOVA	Ordinary
Alpha	0.05
Source of Variation	% of total variation	P value	P value summary	Significant?
Interaction	25.44	<0.0001	****	Yes
Row Factor	25.44	<0.0001	****	Yes
Column Factor	41.71	<0.0001	****	Yes
ANOVA table	SS	DF	MS	F (DFn, DFd)	P value
Interaction	3.479	6	0.5798	F (6, 28) = 16.02	P<0.0001
Row Factor	3.479	6	0.5798	F (6, 28) = 16.02	P<0.0001
Column Factor	5.703	1	5.703	F (1, 28) = 157.6	P<0.0001
Residual	1.013	28	0.0362
Difference between column means
Mean of sham	1
Mean of ACLT	1.737
Difference between means	-0.737
SE of difference	0.05871
95% CI of difference	-0.8573 to -0.6167
