# Supplementary material for: Aberrant subchondral osteoblastic metabolism modifies NaV1.8 for osteoarthritis
Source: eLife. 2020 May 22;9:e57656. doi: 10.7554/eLife.57656 (PMC7308086; doi:10.7554/eLife.57656)
Supplement: Figure 2—source data 1. [file elife-57656-fig2-data1.xlsx]

## Sheet: Sheet1
	OCN Cox2 costaining			Pirt GcAMP3 imaging
	sham	ACLT		sham	ACLT
	23	111		12	51		Von Frey tests
	14	142		7	42			COX2WT sham			COX2WT ACLT			COX2OCN-/- sham			COX2OCN-/- ACLT
	38	67		15	39		0 d	2.8	0.3	6	2.5	0.2	6	2.6	0.4	6	2.4	0.3	6
	35	88					7 d	1.9	0.3	6	0.8	0.2	6	2.1	0.3	6	1	0.2	6
	44	99					14 d	2.5	0.4	6	1	0.3	6	2.4	0.4	6	1.3	0.4	6
	59	102		Table Analyzed	DRG GcAMP3		21 d	2.7	0.4	6	0.9	0.3	6	2.9	0.5	6	1.9	0.4	6
							28 d	3	0.3	6	1.2	0.3	6	2.8	0.4	6	1.8	0.2	6
				Column B	ACLT
	Table Analyzed	OCN COX2 costaining		vs.	vs.
				Column A	sham		Within each row, compare columns (simple effects within rows)
	Column B	ACLT
	vs.	vs.		Unpaired t test			Number of families	5
	Column A	sham		P value	0.0016		Number of comparisons per family	3
				P value summary	**		Alpha	0.05
	Unpaired t test			Significantly different (P < 0.05)?	Yes
	P value	0.0003		One- or two-tailed P value?	Two-tailed		Dunnett's multiple comparisons test	Mean Diff.	95.00% CI of diff.	Significant?	Summary	Adjusted P Value
	P value summary	***		t, df	t=7.606, df=4
	Significantly different (P < 0.05)?	Yes					0 d
	One- or two-tailed P value?	Two-tailed		How big is the difference?			COX2OCN-/- ACLT vs. COX2WT sham	-0.4	-0.8619 to 0.06193	No	ns	0.1048
	t, df	t=5.475, df=10		Mean of column A	11.33		COX2OCN-/- ACLT vs. COX2WT ACLT	-0.1	-0.5619 to 0.3619	No	ns	0.9181
				Mean of column B	44		COX2OCN-/- ACLT vs. COX2OCN-/- sham	-0.2	-0.6619 to 0.2619	No	ns	0.6031
	How big is the difference?			Difference between means (B - A) ± SEM	32.67 ± 4.295
	Mean of column A	35.5		95% confidence interval	20.74 to 44.59		7 d
	Mean of column B	101.5		R squared (eta squared)	0.9353		COX2OCN-/- ACLT vs. COX2WT sham	-0.9	-1.362 to -0.4381	Yes	****	<0.0001
	Difference between means (B - A) ± SEM	66.00 ± 12.05					COX2OCN-/- ACLT vs. COX2WT ACLT	0.2	-0.2619 to 0.6619	No	ns	0.6031
	95% confidence interval	39.14 to 92.86		F test to compare variances			COX2OCN-/- ACLT vs. COX2OCN-/- sham	-1.1	-1.562 to -0.6381	Yes	****	<0.0001
	R squared (eta squared)	0.7499		F, DFn, Dfd	2.388, 2, 2
				P value	0.5904		14 d
	F test to compare variances			P value summary	ns		COX2OCN-/- ACLT vs. COX2WT sham	-1.2	-1.662 to -0.7381	Yes	****	<0.0001
	F, DFn, Dfd	2.489, 5, 5		Significantly different (P < 0.05)?	No		COX2OCN-/- ACLT vs. COX2WT ACLT	0.3	-0.1619 to 0.7619	No	ns	0.2863
	P value	0.3397					COX2OCN-/- ACLT vs. COX2OCN-/- sham	-1.1	-1.562 to -0.6381	Yes	****	<0.0001
	P value summary	ns		Data analyzed
	Significantly different (P < 0.05)?	No		Sample size, column A	3		21 d
				Sample size, column B	3		COX2OCN-/- ACLT vs. COX2WT sham	-0.8	-1.262 to -0.3381	Yes	***	0.0002
	Data analyzed						COX2OCN-/- ACLT vs. COX2WT ACLT	1	0.5381 to 1.462	Yes	****	<0.0001
	Sample size, column A	6					COX2OCN-/- ACLT vs. COX2OCN-/- sham	-1	-1.462 to -0.5381	Yes	****	<0.0001
	Sample size, column B	6
				subchondral PGE2 in COX2WT and COX2OCN-/- ACLT mice			28 d
				COX2WT ACLT	COX2OCN-/- ACLT		COX2OCN-/- ACLT vs. COX2WT sham	-1.2	-1.662 to -0.7381	Yes	****	<0.0001
	Nav1.8 pixel fold in subchondral bone after ACLT			5.1432	3.2412		COX2OCN-/- ACLT vs. COX2WT ACLT	0.6	0.1381 to 1.062	Yes	**	0.0071
	COX2WT ACLT	COX2OCN-/- ACLT		6.23434	2.3124		COX2OCN-/- ACLT vs. COX2OCN-/- sham	-1	-1.462 to -0.5381	Yes	****	<0.0001
	1	0.61		4.3532	1.43243
	0.89	0.53		3.43253	2.42343
	0.88	0.93		3.145	4.23423		Test details	Mean 1	Mean 2	Mean Diff.	SE of diff.	N1	N2	q	DF
	1.12	1.07
	1.31	0.75		Table Analyzed	PGE2		0 d
	1.23	0.64					COX2OCN-/- ACLT vs. COX2WT sham	2.4	2.8	-0.4	0.1936	1	1	2.066	100
				Column B	COX2OCN-/- ACLT		COX2OCN-/- ACLT vs. COX2WT ACLT	2.4	2.5	-0.1	0.1936	1	1	0.5164	100
	Table Analyzed	1.8 pixel		vs.	vs.		COX2OCN-/- ACLT vs. COX2OCN-/- sham	2.4	2.6	-0.2	0.1936	1	1	1.033	100
				Column A	COX2WT ACLT
	Column B	COX2OCN-/- ACLT					7 d
	vs.	vs.		Unpaired t test			COX2OCN-/- ACLT vs. COX2WT sham	1	1.9	-0.9	0.1936	1	1	4.648	100
	Column A	COX2WT ACLT		P value	0.0468		COX2OCN-/- ACLT vs. COX2WT ACLT	1	0.8	0.2	0.1936	1	1	1.033	100
				P value summary	*		COX2OCN-/- ACLT vs. COX2OCN-/- sham	1	2.1	-1.1	0.1936	1	1	5.68	100
	Unpaired t test			Significantly different (P < 0.05)?	Yes
	P value	0.0176		One- or two-tailed P value?	Two-tailed		14 d
	P value summary	*		t, df	t=2.349, df=8		COX2OCN-/- ACLT vs. COX2WT sham	1.3	2.5	-1.2	0.1936	1	1	6.197	100
	Significantly different (P < 0.05)?	Yes					COX2OCN-/- ACLT vs. COX2WT ACLT	1.3	1	0.3	0.1936	1	1	1.549	100
	One- or two-tailed P value?	Two-tailed		How big is the difference?			COX2OCN-/- ACLT vs. COX2OCN-/- sham	1.3	2.4	-1.1	0.1936	1	1	5.68	100
	t, df	t=2.837, df=10		Mean of column A	4.462
				Mean of column B	2.729		21 d
	How big is the difference?			Difference between means (B - A) ± SEM	-1.733 ± 0.7378		COX2OCN-/- ACLT vs. COX2WT sham	1.9	2.7	-0.8	0.1936	1	1	4.131	100
	Mean of column A	1.072		95% confidence interval	-3.434 to -0.03151		COX2OCN-/- ACLT vs. COX2WT ACLT	1.9	0.9	1	0.1936	1	1	5.164	100
	Mean of column B	0.755		R squared (eta squared)	0.4081		COX2OCN-/- ACLT vs. COX2OCN-/- sham	1.9	2.9	-1	0.1936	1	1	5.164	100
	Difference between means (B - A) ± SEM	-0.3167 ± 0.1116
	95% confidence interval	-0.5654 to -0.06794		F test to compare variances			28 d
	R squared (eta squared)	0.4459		F, DFn, Dfd	1.432, 4, 4		COX2OCN-/- ACLT vs. COX2WT sham	1.8	3	-1.2	0.1936	1	1	6.197	100
				P value	0.7362		COX2OCN-/- ACLT vs. COX2WT ACLT	1.8	1.2	0.6	0.1936	1	1	3.098	100
	F test to compare variances			P value summary	ns		COX2OCN-/- ACLT vs. COX2OCN-/- sham	1.8	2.8	-1	0.1936	1	1	5.164	100
	F, DFn, Dfd	1.350, 5, 5		Significantly different (P < 0.05)?	No
	P value	0.75
	P value summary	ns		Data analyzed
	Significantly different (P < 0.05)?	No		Sample size, column A	5
				Sample size, column B	5
	Data analyzed
	Sample size, column A	6					catwalk analysis
	Sample size, column B	6		AP traces				COX2WT ACLT						COX2OCN-/- ACLT
				COX2WT ACLT	COX2OCN-/- ACLT			1	2	3	4	5	6	1	2	3	4	5	6
				15	5		Stands	90.57	86.5	79.8	92.1	79.1	91.3	95.3	82.6	88.9	79.5	85.2	91.7
	NeuN Nav1.8 merged neurons after aclt			11	7		Max Con At	72.79	79.3	88.2	69.4	80.1	73.5	98.3	91.2	83.9	89.4	81.5	92.3
	COX2WT ACLT	COX2OCN-/- ACLT		13	8		Max Intensity At	83.36	73.8	80.5	91.5	83.8	82	94.12	85.1	98.5	86.3	89.4	83.1
	123	144		12	9		swing	129.5	117.9	120.1	106.4	98.5	111.2	89.34	104.3	110.3	101.9	96.5	101.7
	157	158					single stance	80.29	89.5	88.3	92	98.1	99.4	94.96	95.2	99.3	88.4	85.9	91.4
	198	99		Table Analyzed	AP traces
	225	135					Compare each cell mean with the other cell mean in that row
	321	111		Column B	COX2OCN-/- ACLT
	138	103		vs.	vs.		Number of families	1
				Column A	COX2WT ACLT		Number of comparisons per family	5
	Table Analyzed	Nav1.8 NeuN neuron					Alpha	0.05
				Unpaired t test
	Column B	COX2OCN-/- ACLT		P value	0.0039		Sidak's multiple comparisons test	Mean Diff.	95.00% CI of diff.	Significant?	Summary	Adjusted P Value
	vs.	vs.		P value summary	**
	Column A	COX2WT ACLT		Significantly different (P < 0.05)?	Yes		COX2WT ACLT - COX2OCN-/- ACLT
				One- or two-tailed P value?	Two-tailed		Stands	-0.6383	-11.12 to 9.842	No	ns	>0.9999
	Unpaired t test			t, df	t=4.554, df=6		Max Con At	-12.22	-22.70 to -1.738	Yes	*	0.0152
	P value	0.0536					Max Intensity At	-6.927	-17.41 to 3.553	No	ns	0.3542
	P value summary	ns		How big is the difference?			swing	13.26	2.780 to 23.74	Yes	**	0.0071
	Significantly different (P < 0.05)?	No		Mean of column A	12.75		single stance	-1.262	-11.74 to 9.218	No	ns	0.999
	One- or two-tailed P value?	Two-tailed		Mean of column B	7.25
	t, df	t=2.188, df=10		Difference between means (B - A) ± SEM	-5.500 ± 1.208
				95% confidence interval	-8.455 to -2.545		Test details	Mean 1	Mean 2	Mean Diff.	SE of diff.	N1	N2	t	DF
	How big is the difference?			R squared (eta squared)	0.7756
	Mean of column A	193.7					COX2WT ACLT - COX2OCN-/- ACLT
	Mean of column B	125		F test to compare variances			Stands	86.56	87.2	-0.6383	3.925	6	6	0.1626	50
	Difference between means (B - A) ± SEM	-68.67 ± 31.39		F, DFn, Dfd	1.000, 3, 3		Max Con At	77.22	89.43	-12.22	3.925	6	6	3.113	50
	95% confidence interval	-138.6 to 1.272		P value			Max Intensity At	82.49	89.42	-6.927	3.925	6	6	1.765	50
	R squared (eta squared)	0.3237		P value summary			swing	113.9	100.7	13.26	3.925	6	6	3.378	50
				Significantly different (P < 0.05)?	No		single stance	91.27	92.53	-1.262	3.925	6	6	0.3214	50
	F test to compare variances
	F, DFn, Dfd	9.171, 5, 5		Data analyzed
	P value	0.0295		Sample size, column A	4
	P value summary	*		Sample size, column B	4
	Significantly different (P < 0.05)?	Yes
				max current density
	Data analyzed			COX2WT ACLT	COX2OCN-/- ACLT
	Sample size, column A	6		134	79
	Sample size, column B	6		112	67.4
				99.4	88.6
				87.4	72.4
				Table Analyzed	current density
				Column B	COX2OCN-/- ACLT
				vs.	vs.
				Column A	COX2WT ACLT
				Unpaired t test
				P value	0.0288
				P value summary	*
				Significantly different (P < 0.05)?	Yes
				One- or two-tailed P value?	Two-tailed
				t, df	t=2.860, df=6
				How big is the difference?
				Mean of column A	108.2
				Mean of column B	76.85
				Difference between means (B - A) ± SEM	-31.35 ± 10.96
				95% confidence interval	-58.17 to -4.527
				R squared (eta squared)	0.5768
				F test to compare variances
				F, DFn, Dfd	4.727, 3, 3
				P value	0.2343
				P value summary	ns
				Significantly different (P < 0.05)?	No
				Data analyzed
				Sample size, column A	4
				Sample size, column B	4
