# Supplementary material for: Aberrant subchondral osteoblastic metabolism modifies NaV1.8 for osteoarthritis
Source: eLife. 2020 May 22;9:e57656. doi: 10.7554/eLife.57656 (PMC7308086; doi:10.7554/eLife.57656)
Supplement: Figure 3—source data 1. [file elife-57656-fig3-data1.xlsx]

## Sheet: Sheet1
catwalk analysis														von frey tests
EP4wt ACLT						EP4Avi-/- ACLT								EP4wt sham						EP4Avi-/- sham						EP4wt ACLT						EP4Avi-/- ACLT
94.45	97.4	74.8	98.1	83.2	80.7	82.9	97.2	91.1	98.2	98.4	90.2		baseline	2.4	2.3	2	2.1	2.5	2.8	2.2	2.3	2.9	3.4	2.5	2.5	2.4	2.4	2.5	2.1	2.8	2.3	2.1	3.1	2.1	2.5	2.2	2.9
76.9	83.4	69.8	89.3	74.7	83.7	102.6	93.1	99.5	87.8	89.3	95.6		3 d	1.7	1.4	1.9	1.5	1.8	1.3	2.4	2.1	2	1.5	2	1.8	1.1	1.4	1.2	1.6	0.9	1.1	1.5	1.6	1.5	1.8	1.9	2
69.5	72.9	89.5	92.5	91	89.2	101.2	98.4	88.2	80.7	79.5	91.3		1 w	2.5	2.1	2.6	2.3	2.9	3	2.9	1.9	2.4	2.8	2.1	2.7	1.2	1.3	0.9	0.7	1.2	1.1	1.3	1.6	1.9	1.7	1.1	0.9
118.2	123	98.5	112.9	109.7	100.6	95.1	110.2	99.8	101.5	102	97.6		2 w	2.4	2.9	2.1	2.4	2.6	2	2.8	2.9	3.1	2.5	3	2.6	0.9	1.4	1.3	0.15	1.2	1	1.4	2.5	1.8	2	1.6	2.9
106.6	87.9	92.5	99.8	96.3	82	99.8	95.4	87.5	79.3	91	92.3		3 w	2.5	2.3	2.6	2.9	2	3.1	2.1	3.4	3	2.7	2.5	2.6	1.4	1.6	1.3	1.9	1.7	1.5	1.3	1.5	1.8	2.1	2.7	1.9
													4 w	3	2.8	2.3	2.5	3.4	3.8	2.5	2.4	2.8	3.6	3	3.2	1.2	0.6	1.1	0.8	1.3	0.7	1.6	2.6	2.8	1.7	1.9	2.1
	Compare each cell mean with the other cell mean in that row
													Within each row, compare columns (simple effects within rows)
	Number of families	1
	Number of comparisons per family	5											Number of families	6
	Alpha	0.05											Number of comparisons per family	6
													Alpha	0.05
	Sidak's multiple comparisons test	Mean Diff.	95.00% CI of diff.	Significant?	Summary	Adjusted P Value
													Tukey's multiple comparisons test	Mean Diff.	95.00% CI of diff.	Significant?	Summary	Adjusted P Value
	EP4wt ACLT - EP4Avi-/- ACLT
	Stands	-4.892	-17.27 to 7.486	No	ns	0.8276							baseline
	Max Con At	-15.02	-27.39 to -2.639	Yes	*	0.0106							EP4wt sham vs. EP4Avi-/- sham	-0.2833	-0.8514 to 0.2848	No	ns	0.5651
	Max Intensity At	-5.783	-18.16 to 6.594	No	ns	0.7076							EP4wt sham vs. EP4wt ACLT	-0.06667	-0.6348 to 0.5014	No	ns	0.99
	swing	9.45	-2.928 to 21.83	No	ns	0.2131							EP4wt sham vs. EP4Avi-/- ACLT	-0.1333	-0.7014 to 0.4348	No	ns	0.9283
	single stance	3.3	-9.078 to 15.68	No	ns	0.9619							EP4Avi-/- sham vs. EP4wt ACLT	0.2167	-0.3514 to 0.7848	No	ns	0.7533
													EP4Avi-/- sham vs. EP4Avi-/- ACLT	0.15	-0.4181 to 0.7181	No	ns	0.9015
													EP4wt ACLT vs. EP4Avi-/- ACLT	-0.06667	-0.6348 to 0.5014	No	ns	0.99
	Test details	Mean 1	Mean 2	Mean Diff.	SE of diff.	N1	N2	t	DF
													3 d
	EP4wt ACLT - EP4Avi-/- ACLT												EP4wt sham vs. EP4Avi-/- sham	-0.3667	-0.9348 to 0.2014	No	ns	0.3379
	Stands	88.11	93	-4.892	4.636	6	6	1.055	50				EP4wt sham vs. EP4wt ACLT	0.3833	-0.1848 to 0.9514	No	ns	0.2987
	Max Con At	79.63	94.65	-15.02	4.636	6	6	3.239	50				EP4wt sham vs. EP4Avi-/- ACLT	-0.1167	-0.6848 to 0.4514	No	ns	0.9503
	Max Intensity At	84.1	89.88	-5.783	4.636	6	6	1.248	50				EP4Avi-/- sham vs. EP4wt ACLT	0.75	0.1819 to 1.318	Yes	**	0.0044
	swing	110.5	101	9.45	4.636	6	6	2.038	50				EP4Avi-/- sham vs. EP4Avi-/- ACLT	0.25	-0.3181 to 0.8181	No	ns	0.6615
	single stance	94.18	90.88	3.3	4.636	6	6	0.7118	50				EP4wt ACLT vs. EP4Avi-/- ACLT	-0.5	-1.068 to 0.06809	No	ns	0.1054
													1 w
	AP traces			max current density			GcAMP3 imaging			Nav1.8 nerve fiber density			EP4wt sham vs. EP4Avi-/- sham	0.1	-0.4681 to 0.6681	No	ns	0.9678
	EP4f/f ACLT	Advil-EP4f/f ACLT		EP4f/f ACLT	Advil-EP4f/f ACLT		EP4f/f ACLT	Advil-EP4f/f ACLT		EP4wt ACLT	EP4Avi-/- ACLT		EP4wt sham vs. EP4wt ACLT	1.5	0.9319 to 2.068	Yes	****	<0.0001
	12	7		123.4	101.8		28	14		1	0.63		EP4wt sham vs. EP4Avi-/- ACLT	1.15	0.5819 to 1.718	Yes	****	<0.0001
	15	9		143.1	95.3		36	11		0.89	0.61		EP4Avi-/- sham vs. EP4wt ACLT	1.4	0.8319 to 1.968	Yes	****	<0.0001
	11	8		117.9	83.6		19	16		0.98	0.79		EP4Avi-/- sham vs. EP4Avi-/- ACLT	1.05	0.4819 to 1.618	Yes	****	<0.0001
	7	6		144	75.1		21	15		1.12	0.93		EP4wt ACLT vs. EP4Avi-/- ACLT	-0.35	-0.9181 to 0.2181	No	ns	0.3796
	11	7		112.3	69.9		33	24		1.31	1.07
	7	5		99.7	67.8		33	24					2 w
				86.2	79.4								EP4wt sham vs. EP4Avi-/- sham	-0.4167	-0.9848 to 0.1514	No	ns	0.2289
	Table Analyzed	AP traces		99.8	89.6					Table Analyzed	Nav1.8 pixel		EP4wt sham vs. EP4wt ACLT	1.408	0.8402 to 1.976	Yes	****	<0.0001
							Table Analyzed	GcAMP3					EP4wt sham vs. EP4Avi-/- ACLT	0.3667	-0.2014 to 0.9348	No	ns	0.3379
	Column B	Data Set-B		Table Analyzed	current density					Column B	EP4Avi-/- ACLT		EP4Avi-/- sham vs. EP4wt ACLT	1.825	1.257 to 2.393	Yes	****	<0.0001
	vs.	vs.					Column B	Data Set-B		vs.	vs.		EP4Avi-/- sham vs. EP4Avi-/- ACLT	0.7833	0.2152 to 1.351	Yes	**	0.0026
	Column A	Data Set-A		Column B	Advil-EP4f/f ACLT		vs.	vs.		Column A	EP4wt ACLT		EP4wt ACLT vs. EP4Avi-/- ACLT	-1.042	-1.610 to -0.4736	Yes	****	<0.0001
				vs.	vs.		Column A	Data Set-A
	Unpaired t test			Column A	EP4f/f ACLT					Unpaired t test			3 w
	P value	0.03					Unpaired t test			P value	0.0564		EP4wt sham vs. EP4Avi-/- sham	-0.15	-0.7181 to 0.4181	No	ns	0.9015
	P value summary	*		Unpaired t test			P value	0.0202		P value summary	ns		EP4wt sham vs. EP4wt ACLT	1	0.4319 to 1.568	Yes	****	<0.0001
	Significantly different (P < 0.05)?	Yes		P value	0.0016		P value summary	*		Significantly different (P < 0.05)?	No		EP4wt sham vs. EP4Avi-/- ACLT	0.6833	0.1152 to 1.251	Yes	*	0.0115
	One- or two-tailed P value?	Two-tailed		P value summary	**		Significantly different (P < 0.05)?	Yes		One- or two-tailed P value?	Two-tailed		EP4Avi-/- sham vs. EP4wt ACLT	1.15	0.5819 to 1.718	Yes	****	<0.0001
	t, df	t=2.528, df=10		Significantly different (P < 0.05)?	Yes		One- or two-tailed P value?	Two-tailed		t, df	t=2.229, df=8		EP4Avi-/- sham vs. EP4Avi-/- ACLT	0.8333	0.2652 to 1.401	Yes	**	0.0012
				One- or two-tailed P value?	Two-tailed		t, df	t=2.890, df=8					EP4wt ACLT vs. EP4Avi-/- ACLT	-0.3167	-0.8848 to 0.2514	No	ns	0.4696
	How big is the difference?			t, df	t=3.887, df=14					How big is the difference?
	Mean of column A	10.5					How big is the difference?			Mean of column A	1.06		4 w
	Mean of column B	7		How big is the difference?			Mean of column A	27.4		Mean of column B	0.806		EP4wt sham vs. EP4Avi-/- sham	0.05	-0.5181 to 0.6181	No	ns	0.9957
	Difference between means (B - A) ± SEM	-3.500 ± 1.384		Mean of column A	115.8		Mean of column B	16		Difference between means (B - A) ± SEM	-0.2540 ± 0.1140		EP4wt sham vs. EP4wt ACLT	2.017	1.449 to 2.585	Yes	****	<0.0001
	95% confidence interval	-6.585 to -0.4153		Mean of column B	82.81		Difference between means (B - A) ± SEM	-11.40 ± 3.945		95% confidence interval	-0.5168 to 0.008783		EP4wt sham vs. EP4Avi-/- ACLT	0.85	0.2819 to 1.418	Yes	***	0.0009
	R squared (eta squared)	0.3899		Difference between means (B - A) ± SEM	-32.99 ± 8.486		95% confidence interval	-20.50 to -2.304		R squared (eta squared)	0.3831		EP4Avi-/- sham vs. EP4wt ACLT	1.967	1.399 to 2.535	Yes	****	<0.0001
				95% confidence interval	-51.19 to -14.79		R squared (eta squared)	0.5108					EP4Avi-/- sham vs. EP4Avi-/- ACLT	0.8	0.2319 to 1.368	Yes	**	0.002
	F test to compare variances			R squared (eta squared)	0.5191					F test to compare variances			EP4wt ACLT vs. EP4Avi-/- ACLT	-1.167	-1.735 to -0.5986	Yes	****	<0.0001
	F, DFn, Dfd	4.750, 5, 5					F test to compare variances			F, DFn, Dfd	1.474, 4, 4
	P value	0.1124		F test to compare variances			F, DFn, Dfd	2.311, 4, 4		P value	0.7164
	P value summary	ns		F, DFn, Dfd	2.929, 7, 7		P value	0.4372		P value summary	ns		Test details	Mean 1	Mean 2	Mean Diff.	SE of diff.	N1	N2	q	DF
	Significantly different (P < 0.05)?	No		P value	0.1796		P value summary	ns		Significantly different (P < 0.05)?	No
				P value summary	ns		Significantly different (P < 0.05)?	No					baseline
	Data analyzed			Significantly different (P < 0.05)?	No					Data analyzed			EP4wt sham vs. EP4Avi-/- sham	2.35	2.633	-0.2833	0.218	6	6	1.838	120
	Sample size, column A	6					Data analyzed			Sample size, column A	5		EP4wt sham vs. EP4wt ACLT	2.35	2.417	-0.06667	0.218	6	6	0.4324	120
	Sample size, column B	6		Data analyzed			Sample size, column A	5		Sample size, column B	5		EP4wt sham vs. EP4Avi-/- ACLT	2.35	2.483	-0.1333	0.218	6	6	0.8648	120
				Sample size, column A	8		Sample size, column B	5					EP4Avi-/- sham vs. EP4wt ACLT	2.633	2.417	0.2167	0.218	6	6	1.405	120
				Sample size, column B	8								EP4Avi-/- sham vs. EP4Avi-/- ACLT	2.633	2.483	0.15	0.218	6	6	0.9729	120
													EP4wt ACLT vs. EP4Avi-/- ACLT	2.417	2.483	-0.06667	0.218	6	6	0.4324	120
													3 d
													EP4wt sham vs. EP4Avi-/- sham	1.6	1.967	-0.3667	0.218	6	6	2.378	120
	OARSI						Nav1.8 fiber density						EP4wt sham vs. EP4wt ACLT	1.6	1.217	0.3833	0.218	6	6	2.486	120
	EP4wt sham	EP4wt ACLT	EP4Avi-/- sham	EP4Avi-/- ACLT			EP4wt ACLT	EP4Avi-/- ACLT					EP4wt sham vs. EP4Avi-/- ACLT	1.6	1.717	-0.1167	0.218	6	6	0.7567	120
	2	8	2	10			1	0.63					EP4Avi-/- sham vs. EP4wt ACLT	1.967	1.217	0.75	0.218	6	6	4.864	120
	1	6	1	12			0.89	0.61					EP4Avi-/- sham vs. EP4Avi-/- ACLT	1.967	1.717	0.25	0.218	6	6	1.621	120
	4	9	2	6			0.98	0.79					EP4wt ACLT vs. EP4Avi-/- ACLT	1.217	1.717	-0.5	0.218	6	6	3.243	120
	2	6	0	8			1.12	0.93
	1	10	1	6			1.31	1.07					1 w
	0	12	2	6									EP4wt sham vs. EP4Avi-/- sham	2.567	2.467	0.1	0.218	6	6	0.6486	120
							Table Analyzed	Nav1.8 pixel					EP4wt sham vs. EP4wt ACLT	2.567	1.067	1.5	0.218	6	6	9.729	120
	Table Analyzed	OARSI											EP4wt sham vs. EP4Avi-/- ACLT	2.567	1.417	1.15	0.218	6	6	7.459	120
								EP4Avi-/- ACLT					EP4Avi-/- sham vs. EP4wt ACLT	2.467	1.067	1.4	0.218	6	6	9.08	120
	Repeated measures ANOVA summary							vs.					EP4Avi-/- sham vs. EP4Avi-/- ACLT	2.467	1.417	1.05	0.218	6	6	6.81	120
	Assume sphericity?	No						EP4wt ACLT					EP4wt ACLT vs. EP4Avi-/- ACLT	1.067	1.417	-0.35	0.218	6	6	2.27	120
	F	20.7
	P value	0.0013											2 w
	P value summary	**						0.0564					EP4wt sham vs. EP4Avi-/- sham	2.4	2.817	-0.4167	0.218	6	6	2.702	120
	Statistically significant (P < 0.05)?	Yes						ns					EP4wt sham vs. EP4wt ACLT	2.4	0.9917	1.408	0.218	6	6	9.134	120
	Geisser-Greenhouse's epsilon	0.4975						No					EP4wt sham vs. EP4Avi-/- ACLT	2.4	2.033	0.3667	0.218	6	6	2.378	120
	R square	0.8055						Two-tailed					EP4Avi-/- sham vs. EP4wt ACLT	2.817	0.9917	1.825	0.218	6	6	11.84	120
								t=2.229, df=8					EP4Avi-/- sham vs. EP4Avi-/- ACLT	2.817	2.033	0.7833	0.218	6	6	5.081	120
	Was the matching effective?												EP4wt ACLT vs. EP4Avi-/- ACLT	0.9917	2.033	-1.042	0.218	6	6	6.756	120
	F	0.2659
	P value	0.9248						1.06					3 w
	P value summary	ns						0.806					EP4wt sham vs. EP4Avi-/- sham	2.567	2.717	-0.15	0.218	6	6	0.9729	120
	Is there significant matching (P < 0.05)?	No						-0.2540 ± 0.1140					EP4wt sham vs. EP4wt ACLT	2.567	1.567	1	0.218	6	6	6.486	120
	R square	0.01695						-0.5168 to 0.008783					EP4wt sham vs. EP4Avi-/- ACLT	2.567	1.883	0.6833	0.218	6	6	4.432	120
								0.3831					EP4Avi-/- sham vs. EP4wt ACLT	2.717	1.567	1.15	0.218	6	6	7.459	120
	ANOVA table	SS	DF	MS	F (DFn, DFd)	P value							EP4Avi-/- sham vs. EP4Avi-/- ACLT	2.717	1.883	0.8333	0.218	6	6	5.405	120
	Treatment (between columns)	274.5	3	91.49	F (1.493, 7.463) = 20.70	P=0.0013							EP4wt ACLT vs. EP4Avi-/- ACLT	1.567	1.883	-0.3167	0.218	6	6	2.054	120
	Individual (between rows)	5.875	5	1.175	F (5, 15) = 0.2659	P=0.9248		1.474, 4, 4
	Residual (random)	66.29	15	4.419				0.7164					4 w
	Total	346.6	23					ns					EP4wt sham vs. EP4Avi-/- sham	2.967	2.917	0.05	0.218	6	6	0.3243	120
								No					EP4wt sham vs. EP4wt ACLT	2.967	0.95	2.017	0.218	6	6	13.08	120
	Data summary												EP4wt sham vs. EP4Avi-/- ACLT	2.967	2.117	0.85	0.218	6	6	5.513	120
	Number of treatments (columns)	4											EP4Avi-/- sham vs. EP4wt ACLT	2.917	0.95	1.967	0.218	6	6	12.76	120
	Number of subjects (rows)	6						5					EP4Avi-/- sham vs. EP4Avi-/- ACLT	2.917	2.117	0.8	0.218	6	6	5.189	120
	Number of missing values	0						5					EP4wt ACLT vs. EP4Avi-/- ACLT	0.95	2.117	-1.167	0.218	6	6	7.567	120
