# Supplementary material for: Aberrant subchondral osteoblastic metabolism modifies NaV1.8 for osteoarthritis
Source: eLife. 2020 May 22;9:e57656. doi: 10.7554/eLife.57656 (PMC7308086; doi:10.7554/eLife.57656)
Supplement: Figure 4—source data 1. [file elife-57656-fig4-data1.xlsx]

## Sheet: Sheet1
	1. Nav1.8 QPCR										6. nav1,8 PKA costaining merged neurons
	Ctl	2h	6h	12h							sham	ACLT
	1	1.2455	1.806	1.63532							34	85
	1	1.1245	3.1812	2.24124							21	211
	1	1.4255	1.6531	1.7544							54	142
	1	1.322	1.78	2.23535							22	109
	1	1.12425	1.9234	1.47547							37	87
											nav1,8 PKA costaining merged neurons
	Nav1.8 QPCR multiple compasion										Column B	ACLT
	Compare column means (main column effect)										vs.	vs.
											Column A	sham
	Number of families	1
	Number of comparisons per family	6									Unpaired t test
	Alpha	0.05									P value	0.0048
											P value summary	**
	Tukey's multiple comparisons test	Mean Diff.	95.00% CI of diff.	Significant?	Summary	Adjusted P Value					Significantly different (P < 0.05)?	Yes
											One- or two-tailed P value?	Two-tailed
	Ctl vs. 2h	-0.2484	-0.9066 to 0.4099	No	ns	0.6847					t, df	t=3.855, df=8
	Ctl vs. 6h	-1.069	-1.727 to -0.4105	Yes	**	0.002
	Ctl vs. 12h	-0.8684	-1.527 to -0.2101	Yes	**	0.0096					How big is the difference?
	2h vs. 6h	-0.8204	-1.479 to -0.1621	Yes	*	0.0139					Mean of column A	33.6
	2h vs. 12h	-0.62	-1.278 to 0.03824	No	ns	0.0672					Mean of column B	126.8
	6h vs. 12h	0.2004	-0.4579 to 0.8586	No	ns	0.8032					Difference between means (B - A) ± SEM	93.20 ± 24.18
											95% confidence interval	37.45 to 149.0
											R squared (eta squared)	0.6501
	Test details	Mean 1	Mean 2	Mean Diff.	SE of diff.	N1	N2	q	DF
											F test to compare variances
	Ctl vs. 2h	1	1.248	-0.2484	0.2217	5	5	1.584	12		F, DFn, Dfd	15.21, 4, 4
	Ctl vs. 6h	1	2.069	-1.069	0.2217	5	5	6.817	12		P value	0.0219
	Ctl vs. 12h	1	1.868	-0.8684	0.2217	5	5	5.539	12		P value summary	*
	2h vs. 6h	1.248	2.069	-0.8204	0.2217	5	5	5.233	12		Significantly different (P < 0.05)?	Yes
	2h vs. 12h	1.248	1.868	-0.62	0.2217	5	5	3.955	12
	6h vs. 12h	2.069	1.868	0.2004	0.2217	5	5	1.278	12		Data analyzed
											Sample size, column A	5
											Sample size, column B	5
												5. max current density							7. Nav1.8 promotor ChIP qPCR
		4. AP traces										PBS	PGE2	PGE2+666-15	PGE2+PKI					igG			pCREB
		PBS	PGE2	PGE2+666-15	PGE2+PKI							39	178	77	98				primer 1	0.012	0.01	0.011	0.039	0.034	0.035
		4	11	6	4							24	138	108	69				primer 2	0.01	0.011	0.01	0.088	0.095	0.094
		3	15	11	3							62	112	112	132				primer 3	0.011	0.01	0.012	0.058	0.063	0.088
		4	16	8	7							78	168	121	75
		5	10	10	4							59	124	80	68
		6	8	8	8														Table Analyzed	ChIP
		AP traces analysis										Table Analyzed	*Max current density						Two-way ANOVA	Ordinary
		Number of families	1									Data sets analyzed	A-D						Alpha	0.05
		Number of comparisons per family	6
		Alpha	0.05									ANOVA summary							Source of Variation	% of total variation	P value	P value summary	Significant?
												F	11.99						Interaction	12.89	<0.0001	****	Yes
		Sidak's multiple comparisons test	Mean Diff.	95.00% CI of diff.	Significant?	Summary	Adjusted P Value					P value	0.0002						Row Factor	12.34	<0.0001	****	Yes
		PBS vs. PGE2	-7.6	-11.98 to -3.224	Yes	***	0.0005	A-B				P value summary	***						Column Factor	71.82	<0.0001	****	Yes
		PBS vs. PGE2+666-15	-4.2	-8.576 to 0.1756	No	ns	0.0638	A-C				Significant diff. among means (P < 0.05)?	Yes
		PBS vs. PGE2+PKI	-0.8	-5.176 to 3.576	No	ns	0.9953	A-D				R square	0.6921						ANOVA table	SS	DF	MS	F (DFn, DFd)	P value
		PGE2 vs. PGE2+666-15	3.4	-0.9756 to 7.776	No	ns	0.1836	B-C											Interaction	0.002463	2	0.001232	F (2, 12) = 26.21	P<0.0001
		PGE2 vs. PGE2+PKI	6.8	2.424 to 11.18	Yes	**	0.0016	B-D				Brown-Forsythe test							Row Factor	0.002358	2	0.001179	F (2, 12) = 25.09	P<0.0001
		PGE2+666-15 vs. PGE2+PKI	3.4	-0.9756 to 7.776	No	ns	0.1836	C-D				F (DFn, DFd)	0.1759 (3, 16)						Column Factor	0.01372	1	0.01372	F (1, 12) = 292.0	P<0.0001
												P value	0.9111						Residual	0.000564	12	4.7e-05
		Test details	Mean 1	Mean 2	Mean Diff.	SE of diff.	n1	n2	t	DF		P value summary	ns
		PBS vs. PGE2	4.4	12	-7.6	1.459	5	5	5.207	16		Are SDs significantly different (P < 0.05)?	No						Difference between column means
		PBS vs. PGE2+666-15	4.4	8.6	-4.2	1.459	5	5	2.878	16									Mean of igG	0.01078
		PBS vs. PGE2+PKI	4.4	5.2	-0.8	1.459	5	5	0.5482	16		Bartlett's test							Mean of pCREB	0.066
		PGE2 vs. PGE2+666-15	12	8.6	3.4	1.459	5	5	2.33	16		Bartlett's statistic (corrected)	0.6759						Difference between means	-0.05522
		PGE2 vs. PGE2+PKI	12	5.2	6.8	1.459	5	5	4.659	16		P value	0.8788						SE of difference	0.003232
		PGE2+666-15 vs. PGE2+PKI	8.6	5.2	3.4	1.459	5	5	2.33	16		P value summary	ns						95% CI of difference	-0.06226 to -0.04818
												Are SDs significantly different (P < 0.05)?	No
												ANOVA table	SS	DF	MS	F (DFn, DFd)	P value
												Treatment (between columns)	21378	3	7126	F (3, 16) = 11.99	P=0.0002
												Residual (within columns)	9512	16	594.5
												Total	30890	19
												Data summary
												Number of treatments (columns)	4
												Number of values (total)	20
