# Supplementary material for: Aberrant subchondral osteoblastic metabolism modifies NaV1.8 for osteoarthritis
Source: eLife. 2020 May 22;9:e57656. doi: 10.7554/eLife.57656 (PMC7308086; doi:10.7554/eLife.57656)
Supplement: Figure 5—source data 1. [file elife-57656-fig5-data1.xlsx]

## Sheet: Sheet1
		AP traces				max current density			GcAMP3 imaging				Von frey tests
		EP4f/f ACLT	Advil-EP4f/f ACLT			EP4f/f ACLT	Advil-EP4f/f ACLT		EP4f/f ACLT	Advil-EP4f/f ACLT			EP4wt sham						EP4Avi-/- sham						EP4wt ACLT						EP4Avi-/- ACLT
		12	7			123.4	101.8		28	14		baseline	2.4	2.3	2	2.1	2.5	2.8	2.2	2.3	2.9	3.4	2.5	2.5	2.4	2.4	2.5	2.1	2.8	2.3	2.1	3.1	2.1	2.5	2.2	2.9
		15	9			143.1	95.3		36	11		3 d	1.7	1.4	1.9	1.5	1.8	1.3	2.4	2.1	2	1.5	2	1.8	1.1	1.4	1.2	1.6	0.9	1.1	1.5	1.6	1.5	1.8	1.9	2
		11	8			117.9	83.6		19	16		1 w	2.5	2.1	2.6	2.3	2.9	3	2.9	1.9	2.4	2.8	2.1	2.7	1.2	1.3	0.9	0.7	1.2	1.1	1.3	1.6	1.9	1.7	1.1	0.9
		7	6			144	75.1		21	15		2 w	2.4	2.9	2.1	2.4	2.6	2	2.8	2.9	3.1	2.5	3	2.6	0.9	1.4	1.3	0.15	1.2	1	1.4	2.5	1.8	2	1.6	2.9
		11	7			112.3	69.9		33	24		3 w	2.5	2.3	2.6	2.9	2	3.1	2.1	3.4	3	2.7	2.5	2.6	1.4	1.6	1.3	1.9	1.7	1.5	1.3	1.5	1.8	2.1	2.7	1.9
		7	5			99.7	67.8					4 w	3	2.8	2.3	2.5	3.4	3.8	2.5	2.4	2.8	3.6	3	3.2	1.2	0.6	1.1	0.8	1.3	0.7	1.6	2.6	2.8	1.7	1.9	2.1
						86.2	79.4		Table Analyzed	GcAMP3
						99.8	89.6
		Table Analyzed	AP traces						Column B	Data Set-B								Within each row, compare columns (simple effects within rows)
						Table Analyzed	current density		vs.	vs.
		Column B	Data Set-B						Column A	Data Set-A								Number of families	6
		vs.	vs.			Column B	Advil-EP4f/f ACLT											Number of comparisons per family	6
		Column A	Data Set-A			vs.	vs.		Unpaired t test									Alpha	0.05
						Column A	EP4f/f ACLT		P value	0.0202
		Unpaired t test							P value summary	*								Tukey's multiple comparisons test	Mean Diff.	95.00% CI of diff.	Significant?	Summary	Adjusted P Value
		P value	0.03			Unpaired t test			Significantly different (P < 0.05)?	Yes
		P value summary	*			P value	0.0016		One- or two-tailed P value?	Two-tailed								baseline
		Significantly different (P < 0.05)?	Yes			P value summary	**		t, df	t=2.890, df=8								EP4wt sham vs. EP4Avi-/- sham	-0.2833	-0.8514 to 0.2848	No	ns	0.5651
		One- or two-tailed P value?	Two-tailed			Significantly different (P < 0.05)?	Yes											EP4wt sham vs. EP4wt ACLT	-0.06667	-0.6348 to 0.5014	No	ns	0.99
		t, df	t=2.528, df=10			One- or two-tailed P value?	Two-tailed		How big is the difference?									EP4wt sham vs. EP4Avi-/- ACLT	-0.1333	-0.7014 to 0.4348	No	ns	0.9283
						t, df	t=3.887, df=14		Mean of column A	27.4								EP4Avi-/- sham vs. EP4wt ACLT	0.2167	-0.3514 to 0.7848	No	ns	0.7533
		How big is the difference?							Mean of column B	16								EP4Avi-/- sham vs. EP4Avi-/- ACLT	0.15	-0.4181 to 0.7181	No	ns	0.9015
		Mean of column A	10.5			How big is the difference?			Difference between means (B - A) ± SEM	-11.40 ± 3.945								EP4wt ACLT vs. EP4Avi-/- ACLT	-0.06667	-0.6348 to 0.5014	No	ns	0.99
		Mean of column B	7			Mean of column A	115.8		95% confidence interval	-20.50 to -2.304
		Difference between means (B - A) ± SEM	-3.500 ± 1.384			Mean of column B	82.81		R squared (eta squared)	0.5108								3 d
		95% confidence interval	-6.585 to -0.4153			Difference between means (B - A) ± SEM	-32.99 ± 8.486											EP4wt sham vs. EP4Avi-/- sham	-0.3667	-0.9348 to 0.2014	No	ns	0.3379
		R squared (eta squared)	0.3899			95% confidence interval	-51.19 to -14.79		F test to compare variances									EP4wt sham vs. EP4wt ACLT	0.3833	-0.1848 to 0.9514	No	ns	0.2987
						R squared (eta squared)	0.5191		F, DFn, Dfd	2.311, 4, 4								EP4wt sham vs. EP4Avi-/- ACLT	-0.1167	-0.6848 to 0.4514	No	ns	0.9503
		F test to compare variances							P value	0.4372								EP4Avi-/- sham vs. EP4wt ACLT	0.75	0.1819 to 1.318	Yes	**	0.0044
		F, DFn, Dfd	4.750, 5, 5			F test to compare variances			P value summary	ns								EP4Avi-/- sham vs. EP4Avi-/- ACLT	0.25	-0.3181 to 0.8181	No	ns	0.6615
		P value	0.1124			F, DFn, Dfd	2.929, 7, 7		Significantly different (P < 0.05)?	No								EP4wt ACLT vs. EP4Avi-/- ACLT	-0.5	-1.068 to 0.06809	No	ns	0.1054
		P value summary	ns			P value	0.1796
		Significantly different (P < 0.05)?	No			P value summary	ns		Data analyzed									1 w
						Significantly different (P < 0.05)?	No		Sample size, column A	5								EP4wt sham vs. EP4Avi-/- sham	0.1	-0.4681 to 0.6681	No	ns	0.9678
		Data analyzed							Sample size, column B	5								EP4wt sham vs. EP4wt ACLT	1.5	0.9319 to 2.068	Yes	****	<0.0001
		Sample size, column A	6			Data analyzed												EP4wt sham vs. EP4Avi-/- ACLT	1.15	0.5819 to 1.718	Yes	****	<0.0001
		Sample size, column B	6			Sample size, column A	8											EP4Avi-/- sham vs. EP4wt ACLT	1.4	0.8319 to 1.968	Yes	****	<0.0001
						Sample size, column B	8											EP4Avi-/- sham vs. EP4Avi-/- ACLT	1.05	0.4819 to 1.618	Yes	****	<0.0001
																		EP4wt ACLT vs. EP4Avi-/- ACLT	-0.35	-0.9181 to 0.2181	No	ns	0.3796
																		2 w
																		EP4wt sham vs. EP4Avi-/- sham	-0.4167	-0.9848 to 0.1514	No	ns	0.2289
																		EP4wt sham vs. EP4wt ACLT	1.408	0.8402 to 1.976	Yes	****	<0.0001
																		EP4wt sham vs. EP4Avi-/- ACLT	0.3667	-0.2014 to 0.9348	No	ns	0.3379
																		EP4Avi-/- sham vs. EP4wt ACLT	1.825	1.257 to 2.393	Yes	****	<0.0001
																		EP4Avi-/- sham vs. EP4Avi-/- ACLT	0.7833	0.2152 to 1.351	Yes	**	0.0026
																		EP4wt ACLT vs. EP4Avi-/- ACLT	-1.042	-1.610 to -0.4736	Yes	****	<0.0001
																		3 w
																		EP4wt sham vs. EP4Avi-/- sham	-0.15	-0.7181 to 0.4181	No	ns	0.9015
																		EP4wt sham vs. EP4wt ACLT	1	0.4319 to 1.568	Yes	****	<0.0001
																		EP4wt sham vs. EP4Avi-/- ACLT	0.6833	0.1152 to 1.251	Yes	*	0.0115
																		EP4Avi-/- sham vs. EP4wt ACLT	1.15	0.5819 to 1.718	Yes	****	<0.0001
																		EP4Avi-/- sham vs. EP4Avi-/- ACLT	0.8333	0.2652 to 1.401	Yes	**	0.0012
																		EP4wt ACLT vs. EP4Avi-/- ACLT	-0.3167	-0.8848 to 0.2514	No	ns	0.4696
																		4 w
																		EP4wt sham vs. EP4Avi-/- sham	0.05	-0.5181 to 0.6181	No	ns	0.9957
																		EP4wt sham vs. EP4wt ACLT	2.017	1.449 to 2.585	Yes	****	<0.0001
																		EP4wt sham vs. EP4Avi-/- ACLT	0.85	0.2819 to 1.418	Yes	***	0.0009
																		EP4Avi-/- sham vs. EP4wt ACLT	1.967	1.399 to 2.535	Yes	****	<0.0001
																		EP4Avi-/- sham vs. EP4Avi-/- ACLT	0.8	0.2319 to 1.368	Yes	**	0.002
																		EP4wt ACLT vs. EP4Avi-/- ACLT	-1.167	-1.735 to -0.5986	Yes	****	<0.0001
																		Test details	Mean 1	Mean 2	Mean Diff.	SE of diff.	N1	N2	q	DF
																		baseline
																		EP4wt sham vs. EP4Avi-/- sham	2.35	2.633	-0.2833	0.218	6	6	1.838	120
																		EP4wt sham vs. EP4wt ACLT	2.35	2.417	-0.06667	0.218	6	6	0.4324	120
																		EP4wt sham vs. EP4Avi-/- ACLT	2.35	2.483	-0.1333	0.218	6	6	0.8648	120
																		EP4Avi-/- sham vs. EP4wt ACLT	2.633	2.417	0.2167	0.218	6	6	1.405	120
																		EP4Avi-/- sham vs. EP4Avi-/- ACLT	2.633	2.483	0.15	0.218	6	6	0.9729	120
																		EP4wt ACLT vs. EP4Avi-/- ACLT	2.417	2.483	-0.06667	0.218	6	6	0.4324	120
																		3 d
																		EP4wt sham vs. EP4Avi-/- sham	1.6	1.967	-0.3667	0.218	6	6	2.378	120
																		EP4wt sham vs. EP4wt ACLT	1.6	1.217	0.3833	0.218	6	6	2.486	120
																		EP4wt sham vs. EP4Avi-/- ACLT	1.6	1.717	-0.1167	0.218	6	6	0.7567	120
																		EP4Avi-/- sham vs. EP4wt ACLT	1.967	1.217	0.75	0.218	6	6	4.864	120
																		EP4Avi-/- sham vs. EP4Avi-/- ACLT	1.967	1.717	0.25	0.218	6	6	1.621	120
																		EP4wt ACLT vs. EP4Avi-/- ACLT	1.217	1.717	-0.5	0.218	6	6	3.243	120
																		1 w
																		EP4wt sham vs. EP4Avi-/- sham	2.567	2.467	0.1	0.218	6	6	0.6486	120
																		EP4wt sham vs. EP4wt ACLT	2.567	1.067	1.5	0.218	6	6	9.729	120
																		EP4wt sham vs. EP4Avi-/- ACLT	2.567	1.417	1.15	0.218	6	6	7.459	120
																		EP4Avi-/- sham vs. EP4wt ACLT	2.467	1.067	1.4	0.218	6	6	9.08	120
																		EP4Avi-/- sham vs. EP4Avi-/- ACLT	2.467	1.417	1.05	0.218	6	6	6.81	120
																		EP4wt ACLT vs. EP4Avi-/- ACLT	1.067	1.417	-0.35	0.218	6	6	2.27	120
																		2 w
																		EP4wt sham vs. EP4Avi-/- sham	2.4	2.817	-0.4167	0.218	6	6	2.702	120
																		EP4wt sham vs. EP4wt ACLT	2.4	0.9917	1.408	0.218	6	6	9.134	120
																		EP4wt sham vs. EP4Avi-/- ACLT	2.4	2.033	0.3667	0.218	6	6	2.378	120
																		EP4Avi-/- sham vs. EP4wt ACLT	2.817	0.9917	1.825	0.218	6	6	11.84	120
																		EP4Avi-/- sham vs. EP4Avi-/- ACLT	2.817	2.033	0.7833	0.218	6	6	5.081	120
																		EP4wt ACLT vs. EP4Avi-/- ACLT	0.9917	2.033	-1.042	0.218	6	6	6.756	120
																		3 w
																		EP4wt sham vs. EP4Avi-/- sham	2.567	2.717	-0.15	0.218	6	6	0.9729	120
																		EP4wt sham vs. EP4wt ACLT	2.567	1.567	1	0.218	6	6	6.486	120
																		EP4wt sham vs. EP4Avi-/- ACLT	2.567	1.883	0.6833	0.218	6	6	4.432	120
																		EP4Avi-/- sham vs. EP4wt ACLT	2.717	1.567	1.15	0.218	6	6	7.459	120
																		EP4Avi-/- sham vs. EP4Avi-/- ACLT	2.717	1.883	0.8333	0.218	6	6	5.405	120
																		EP4wt ACLT vs. EP4Avi-/- ACLT	1.567	1.883	-0.3167	0.218	6	6	2.054	120
																		4 w
																		EP4wt sham vs. EP4Avi-/- sham	2.967	2.917	0.05	0.218	6	6	0.3243	120
																		EP4wt sham vs. EP4wt ACLT	2.967	0.95	2.017	0.218	6	6	13.08	120
																		EP4wt sham vs. EP4Avi-/- ACLT	2.967	2.117	0.85	0.218	6	6	5.513	120
																		EP4Avi-/- sham vs. EP4wt ACLT	2.917	0.95	1.967	0.218	6	6	12.76	120
																		EP4Avi-/- sham vs. EP4Avi-/- ACLT	2.917	2.117	0.8	0.218	6	6	5.189	120
																		EP4wt ACLT vs. EP4Avi-/- ACLT	0.95	2.117	-1.167	0.218	6	6	7.567	120
													Catwalk analysis
														EP4wt ACLT						EP4Avi-/- ACLT
													Stands	94.45	97.4	74.8	98.1	83.2	80.7	82.9	97.2	91.1	98.2	98.4	90.2
													Max Con At	76.9	83.4	69.8	89.3	74.7	83.7	102.6	93.1	99.5	87.8	89.3	95.6
													Max Intensity At	69.5	72.9	89.5	92.5	91	89.2	101.2	98.4	88.2	80.7	79.5	91.3
													swing	118.2	123	98.5	112.9	109.7	100.6	95.1	110.2	99.8	101.5	102	97.6
													single stance	106.6	87.9	92.5	99.8	96.3	82	99.8	95.4	87.5	79.3	91	92.3
														Compare each cell mean with the other cell mean in that row
														Number of families	1
														Number of comparisons per family	5
														Alpha	0.05
														Sidak's multiple comparisons test	Mean Diff.	95.00% CI of diff.	Significant?	Summary	Adjusted P Value
														EP4wt ACLT - EP4Avi-/- ACLT
														Stands	-4.892	-17.27 to 7.486	No	ns	0.8276
														Max Con At	-15.02	-27.39 to -2.639	Yes	*	0.0106
														Max Intensity At	-5.783	-18.16 to 6.594	No	ns	0.7076
														swing	9.45	-2.928 to 21.83	No	ns	0.2131
														single stance	3.3	-9.078 to 15.68	No	ns	0.9619
														Test details	Mean 1	Mean 2	Mean Diff.	SE of diff.	N1	N2	t	DF
														EP4wt ACLT - EP4Avi-/- ACLT
														Stands	88.11	93	-4.892	4.636	6	6	1.055	50
														Max Con At	79.63	94.65	-15.02	4.636	6	6	3.239	50
														Max Intensity At	84.1	89.88	-5.783	4.636	6	6	1.248	50
														swing	110.5	101	9.45	4.636	6	6	2.038	50
														single stance	94.18	90.88	3.3	4.636	6	6	0.7118	50
