# Supplementary material for: Aberrant subchondral osteoblastic metabolism modifies NaV1.8 for osteoarthritis
Source: eLife. 2020 May 22;9:e57656. doi: 10.7554/eLife.57656 (PMC7308086; doi:10.7554/eLife.57656)
Supplement: Figure 6—source data 1. [file elife-57656-fig6-data1.xlsx]

## Sheet: Sheet1
			OARSI							Osx							pSMAD2/3							nav1.8 nerve density							BV/TV
			sham	Vehicle	ACLT+Conjugate					sham	Vehicle	ACLT+Conjugate					sham	Vehicle	ACLT+Conjugate					sham	Vehicle	Treatment					sham	Vehicle	ACLT+Conjugate
			1	8	4					18	112	47					59	520	224					1	2.5	1.9					77.5	59.2	73.2
			2	6	2					47	139	32					107	329	265					0.7	2.8	2.4					79.3	53.4	66.4
			2	8	6					12	87	112					63	297	173					1.4	3.1	2					69.2	66.2	65.8
			3	10	4					21	57	66					124	438	249					1.5	2.6	1.3					72.5	63.9	66.8
			1	5	3					24	98	44					70	491	109					1.2	1.9	1.5					75.9	61.8	65.2
			2	7	2					26	124	69					145	257	207					1.1	2.9	1.7					80.1	55	63.2
										28	79	50
			Table Analyzed	OARSI													Table Analyzed	pSMAD2/3						Table Analyzed	Nav1.8						Table Analyzed	BV/TV
										Table Analyzed	Osx
			Repeated measures ANOVA summary														Repeated measures ANOVA summary							Repeated measures ANOVA summary							Repeated measures ANOVA summary
			Assume sphericity?	No						Repeated measures ANOVA summary							Assume sphericity?	No						Assume sphericity?	No						Assume sphericity?	No
			F	40.14						Assume sphericity?	No						F	21.25						F	23.94						F	15.57
			P value	<0.0001						F	16.27						P value	0.0028						P value	0.0006						P value	0.0045
			P value summary	****						P value	0.0012						P value summary	**						P value summary	***						P value summary	**
			Statistically significant (P < 0.05)?	Yes						P value summary	**						Statistically significant (P < 0.05)?	Yes						Statistically significant (P < 0.05)?	Yes						Statistically significant (P < 0.05)?	Yes
			Geisser-Greenhouse's epsilon	0.9606						Statistically significant (P < 0.05)?	Yes						Geisser-Greenhouse's epsilon	0.6139						Geisser-Greenhouse's epsilon	0.8069						Geisser-Greenhouse's epsilon	0.6689
			R square	0.8892						Geisser-Greenhouse's epsilon	0.7258						R square	0.8095						R square	0.8272						R square	0.7569
										R square	0.6992
			Was the matching effective?														Was the matching effective?							Was the matching effective?							Was the matching effective?
			F	2.991						Was the matching effective?							F	0.6324						F	0.9567						F	0.2367
			P value	0.0661						F	0.5064						P value	0.6801						P value	0.487						P value	0.9374
			P value summary	ns						P value	0.8149						P value summary	ns						P value summary	ns						P value summary	ns
			Is there significant matching (P < 0.05)?	No						P value summary	ns						Is there significant matching (P < 0.05)?	No						Is there significant matching (P < 0.05)?	No						Is there significant matching (P < 0.05)?	No
			R square	0.1421						Is there significant matching (P < 0.05)?	No						R square	0.05681						R square	0.07633						R square	0.02796
										R square	0.07078
			ANOVA table	SS	DF	MS	F (DFn, DFd)	P value									ANOVA table	SS	DF	MS	F (DFn, DFd)	P value		ANOVA table	SS	DF	MS	F (DFn, DFd)	P value		ANOVA table	SS	DF	MS	F (DFn, DFd)	P value
			Treatment (between columns)	95.44	2	47.72	F (1.921, 9.606) = 40.14	P<0.0001		ANOVA table	SS	DF	MS	F (DFn, DFd)	P value		Treatment (between columns)	264833	2	132417	F (1.228, 6.139) = 21.25	P=0.0028		Treatment (between columns)	6.634	2	3.317	F (1.614, 8.069) = 23.94	P=0.0006		Treatment (between columns)	756.6	2	378.3	F (1.338, 6.689) = 15.57	P=0.0045
			Individual (between rows)	17.78	5	3.556	F (5, 10) = 2.991	P=0.0661		Treatment (between columns)	19392	2	9696	F (1.452, 10.16) = 16.27	P=0.0012		Individual (between rows)	19704	5	3941	F (5, 10) = 0.6324	P=0.6801		Individual (between rows)	0.6628	5	0.1326	F (5, 10) = 0.9567	P=0.4870		Individual (between rows)	28.76	5	5.752	F (5, 10) = 0.2367	P=0.9374
			Residual (random)	11.89	10	1.189				Individual (between rows)	2113	7	301.8	F (7, 14) = 0.5064	P=0.8149		Residual (random)	62318	10	6232				Residual (random)	1.386	10	0.1386				Residual (random)	243	10	24.3
			Total	125.1	17					Residual (random)	8343	14	595.9				Total	346856	17					Total	8.683	17					Total	1028	17
										Total	29848	23
			Data summary														Data summary							Data summary							Data summary
			Number of treatments (columns)	3						Data summary							Number of treatments (columns)	3						Number of treatments (columns)	3						Number of treatments (columns)	3
			Number of subjects (rows)	6						Number of treatments (columns)	3						Number of subjects (rows)	6						Number of subjects (rows)	6						Number of subjects (rows)	6
			Number of missing values	0						Number of subjects (rows)	8						Number of missing values	0						Number of missing values	0						Number of missing values	0
										Number of missing values	0
			GcAMP3 imaging							subchondral PGE2							TRAP							AP traces							max current density
			sham	Vehicle	ACLT+Conjugate					sham	Vehicle	Conjugate					sham	Vehicle	Treatment					sham	Vehicle	A-803467	Conjugate				sham	Vehicle	A-803467	Conjugate
			11	38	11					1.89	5.48	3.5345					15	102	54					2	14	5	6				67.8	109.1	34.5	75.4
			9	32	16					2.75	6.76	2.4353					31	69	34					4	11	9	7				65.2	99.8	63.4	88.4
			18	22	22					1.765	7.3443	1.6465					20	91	83					3	18	6	8				63.5	121.5	45.2	73.4
			14	26	24					0.978	3.576	3.23253					11	47	42					4	12	4	12				54.2	86.2	45.6	67.4
										3.12	2.534	2.3524					33	78	59
			Table Analyzed	GcAMP3						1.01	4.555	4.23432												Table Analyzed	AP traces						Table Analyzed	Current density
			Data sets analyzed	A-C													Table Analyzed	TRAP
										Table Analyzed	subchondral PGE2													Repeated measures ANOVA summary							Repeated measures ANOVA summary
			ANOVA summary														Repeated measures ANOVA summary							Assume sphericity?	No						Assume sphericity?	No
			F	8.592						Repeated measures ANOVA summary							Assume sphericity?	No						F	12.31						F	24.08
			P value	0.0082						Assume sphericity?	No						F	17.71						P value	0.0077						P value	0.0069
			P value summary	**						F	7.381						P value	0.0015						P value summary	**						P value summary	**
			Significant diff. among means (P < 0.05)?	Yes						P value	0.0159						P value summary	**						Statistically significant (P < 0.05)?	Yes						Statistically significant (P < 0.05)?	Yes
			R square	0.6563						P value summary	*						Statistically significant (P < 0.05)?	Yes						Geisser-Greenhouse's epsilon	0.6613						Geisser-Greenhouse's epsilon	0.4455
										Statistically significant (P < 0.05)?	Yes						Geisser-Greenhouse's epsilon	0.9445						R square	0.804						R square	0.8892
			Brown-Forsythe test							Geisser-Greenhouse's epsilon	0.854						R square	0.8157
			F (DFn, DFd)	1.082 (2, 9)						R square	0.5962													Was the matching effective?							Was the matching effective?
			P value	0.3792													Was the matching effective?							F	0.423						F	1.934
			P value summary	ns						Was the matching effective?							F	2.08						P value	0.7411						P value	0.1947
			Are SDs significantly different (P < 0.05)?	No						F	0.45						P value	0.1755						P value summary	ns						P value summary	ns
										P value	0.8043						P value summary	ns						Is there significant matching (P < 0.05)?	No						Is there significant matching (P < 0.05)?	No
			Bartlett's test							P value summary	ns						Is there significant matching (P < 0.05)?	No						R square	0.02689						R square	0.06667
			Bartlett's statistic (corrected)	0.8421						Is there significant matching (P < 0.05)?	No						R square	0.1608
			P value	0.6564						R square	0.0833													ANOVA table	SS	DF	MS	F (DFn, DFd)	P value		ANOVA table	SS	DF	MS	F (DFn, DFd)	P value
			P value summary	ns													ANOVA table	SS	DF	MS	F (DFn, DFd)	P value		Treatment (between columns)	238.2	3	79.4	F (1.984, 5.952) = 12.31	P=0.0077		Treatment (between columns)	7012	3	2337	F (1.336, 4.009) = 24.08	P=0.0069
			Are SDs significantly different (P < 0.05)?	No						ANOVA table	SS	DF	MS	F (DFn, DFd)	P value		Treatment (between columns)	7747	2	3873	F (1.889, 7.556) = 17.71	P=0.0015		Individual (between rows)	8.188	3	2.729	F (3, 9) = 0.4230	P=0.7411		Individual (between rows)	563.2	3	187.7	F (3, 9) = 1.934	P=0.1947
										Treatment (between columns)	30.57	2	15.29	F (1.708, 8.540) = 7.381	P=0.0159		Individual (between rows)	1820	4	455.1	F (4, 8) = 2.080	P=0.1755		Residual (random)	58.06	9	6.451				Residual (random)	873.6	9	97.07
			ANOVA table	SS	DF	MS	F (DFn, DFd)	P value		Individual (between rows)	4.66	5	0.932	F (5, 10) = 0.4500	P=0.8043		Residual (random)	1750	8	218.8				Total	304.4	15					Total	8449	15
			Treatment (between columns)	568.5	2	284.3	F (2, 9) = 8.592	P=0.0082		Residual (random)	20.71	10	2.071				Total	11317	14
			Residual (within columns)	297.8	9	33.08				Total	55.94	17												Data summary							Data summary
			Total	866.3	11												Data summary							Number of treatments (columns)	4						Number of treatments (columns)	4
										Data summary							Number of treatments (columns)	3						Number of subjects (rows)	4						Number of subjects (rows)	4
			Data summary							Number of treatments (columns)	3						Number of subjects (rows)	5						Number of missing values	0						Number of missing values	0
			Number of treatments (columns)	3						Number of subjects (rows)	6						Number of missing values	0
			Number of values (total)	12						Number of missing values	0
			Von Frey tests
				sham								Vehicle								ACLT+Conjugate
			baseline	2.5	2.9	2.8	2.4	2.9	3.1	3.4	2.5	2.6	2.3	2.1	2.9	3.3	2.5	2.8	3	2.9	3.1	2.4	2.8	2.5	3.2	2.7	2.6
			3 d	1.8	1.2	2.5	1.4	1.3	1.8	1.2	2	1.4	1.6	1.1	1.4	0.7	1.1	1.7	1.6	1.1	0.8	1.4	1.2	1.5	1.3	1.1	1
			1 w	2	2.5	1.6	1.8	2.3	2.2	1.9	1.7	0.9	1.1	0.8	1.2	0.7	1	0.8	0.5	0.8	1.2	1.3	0.9	1.2	1.4	1.1	0.7
			2 w	2.5	2.1	2.6	1.5	2.1	2.4	2	2.2	0.9	1.1	1.2	1	1.2	0.9	0.7	1.6	1.4	1.8	2.1	1.4	1.6	1.7	1.7	2.1
			3 w	2.4	2.3	2.9	2.3	3	2.3	3.2	2.7	1	0.9	1.1	0.7	0.8	0.9	1.1	0.9	1.7	1.4	1.6	1.5	1.8	1.1	1.4	1.3
			4 w	3.1	3	2.8	2.4	2.9	3.3	2.5	2.7	1.2	1	1.5	1.3	0.9	0.7	0.6	1.1	1.3	1.2	1.8	1.4	1.5	1.7	1.3	1.5
										Table Analyzed	Von Frey
										Two-way ANOVA	Ordinary
										Alpha	0.05
										Source of Variation	% of total variation	P value	P value summary	Significant?
										Interaction	13.38	<0.0001	****	Yes
										Row Factor	39.63	<0.0001	****	Yes
										Column Factor	33.09	<0.0001	****	Yes
										ANOVA table	SS	DF	MS	F (DFn, DFd)	P value
										Interaction	10.96	10	1.096	F (10, 126) = 12.13	P<0.0001
										Row Factor	32.46	5	6.491	F (5, 126) = 71.85	P<0.0001
										Column Factor	27.1	2	13.55	F (2, 126) = 150.0	P<0.0001
										Residual	11.38	126	0.09034
				Catwalk analysis
				sham						Vehicle						ACLT+Conjugate
			Stands	99.8	103.1	110.5	89.3	98.5	92.6	90.57	86.5	79.8	92.1	79.1	91.3	95.3	82.6	88.9	79.5	85.2	91.7
			Max Con At	97.4	99.8	105.5	110.4	96.3	99.1	72.79	79.3	88.2	69.4	80.1	73.5	98.3	91.2	83.9	89.4	81.5	92.3
			Max Intensity At	89.4	95.3	105.1	110.4	93.7	98.8	83.36	73.8	80.5	91.5	83.8	82	94.12	85.1	98.5	86.3	89.4	83.1
			swing	94.6	99.5	91.5	89.4	109.3	101.2	129.5	117.9	120.1	106.4	98.5	111.2	89.34	104.3	110.3	101.9	96.5	101.7
			single stance	99.5	113.4	105.3	101.9	95.6	98.3	80.29	89.5	88.3	92	98.1	99.4	94.96	95.2	99.3	88.4	85.9	91.4
								Max Intensity At
								sham vs. Vehicle	16.29	6.842 to 25.74	Yes	***	0.0003
								sham vs. Conjugate	9.363	-0.08426 to 18.81	No	ns	0.0526
								Vehicle vs. Conjugate	-6.927	-16.37 to 2.521	No	ns	0.1926
								swing
								sham vs. Vehicle	-16.35	-25.80 to -6.902	Yes	***	0.0003
								sham vs. Conjugate	-3.09	-12.54 to 6.358	No	ns	0.7152
								Vehicle vs. Conjugate	13.26	3.812 to 22.71	Yes	**	0.0035
								single stance
								sham vs. Vehicle	11.07	1.621 to 20.52	Yes	*	0.0176
								sham vs. Conjugate	9.807	0.3591 to 19.25	Yes	*	0.0401
								Vehicle vs. Conjugate	-1.262	-10.71 to 8.186	No	ns	0.9454
								Test details	Mean 1	Mean 2	Mean Diff.	SE of diff.	N1	N2	q	DF
								Stands
								sham vs. Vehicle	98.97	86.56	12.41	3.951	6	6	4.44	75
								sham vs. Conjugate	98.97	87.2	11.77	3.951	6	6	4.212	75
								Vehicle vs. Conjugate	86.56	87.2	-0.6383	3.951	6	6	0.2285	75
								Max Con At
								sham vs. Vehicle	101.4	77.22	24.2	3.951	6	6	8.662	75
								sham vs. Conjugate	101.4	89.43	11.98	3.951	6	6	4.289	75
								Vehicle vs. Conjugate	77.22	89.43	-12.22	3.951	6	6	4.373	75
								Max Intensity At
								sham vs. Vehicle	98.78	82.49	16.29	3.951	6	6	5.831	75
								sham vs. Conjugate	98.78	89.42	9.363	3.951	6	6	3.351	75
								Vehicle vs. Conjugate	82.49	89.42	-6.927	3.951	6	6	2.479	75
								swing
								sham vs. Vehicle	97.58	113.9	-16.35	3.951	6	6	5.852	75
								sham vs. Conjugate	97.58	100.7	-3.09	3.951	6	6	1.106	75
								Vehicle vs. Conjugate	113.9	100.7	13.26	3.951	6	6	4.746	75
								single stance
								sham vs. Vehicle	102.3	91.27	11.07	3.951	6	6	3.962	75
								sham vs. Conjugate	102.3	92.53	9.807	3.951	6	6	3.51	75
								Vehicle vs. Conjugate	91.27	92.53	-1.262	3.951	6	6	0.4516	75
